# Supplementary material for: Shellmycin A–D, Novel Bioactive Tetrahydroanthra-γ-Pyrone Antibiotics from Marine Streptomyces sp. Shell-016
Source: PubMed Central journal article supplement (PMC7024178; doi:10.3390/md18010058), 2020-01-16
Supplement: marinedrugs-18-00058-s001.pdf [file marinedrugs-18-00058-s001.pdf]

## Supplementary Materials

20191108SH-1 #1 RT: 0.03 AV: 1 NL: 2.38E5  
T: FTMS + p ESI Full ms [100.0000-1000.0000]

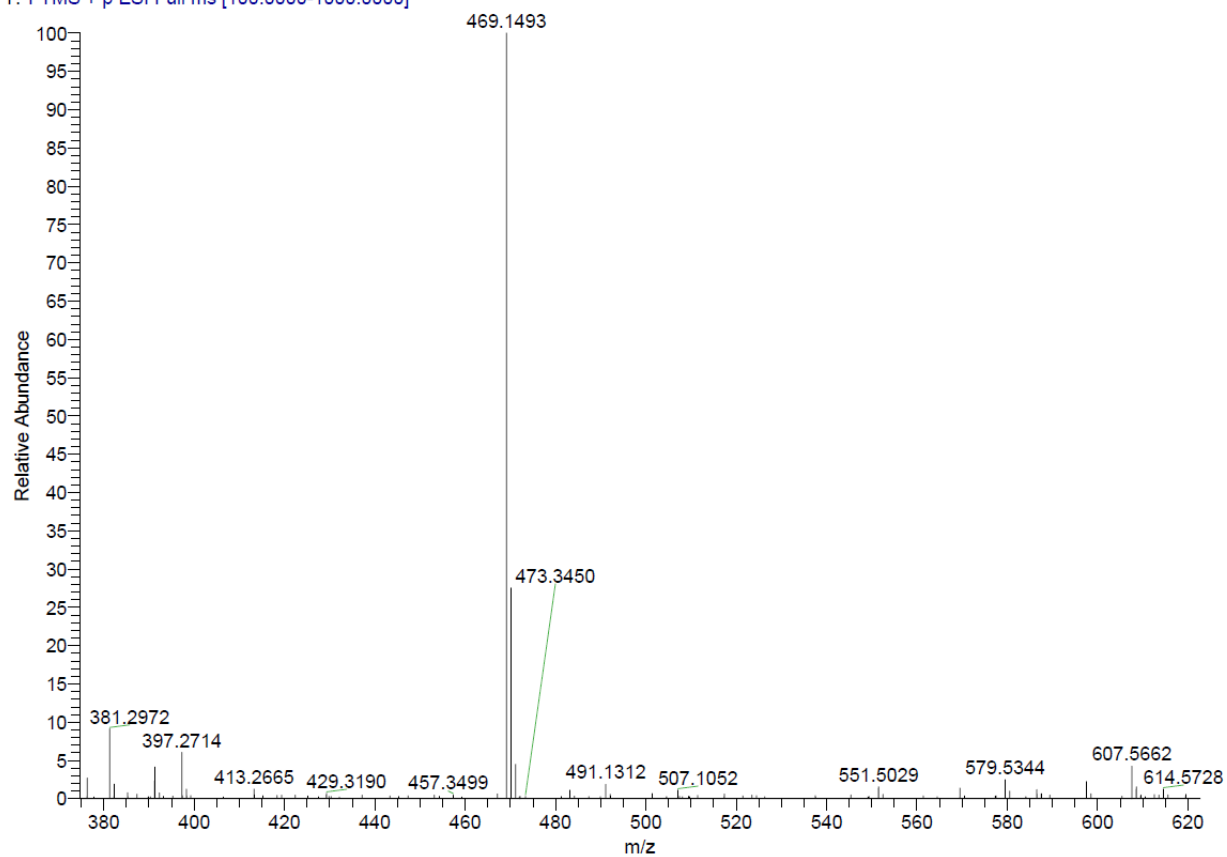

Figure S1. The HR-MS of compound **1**

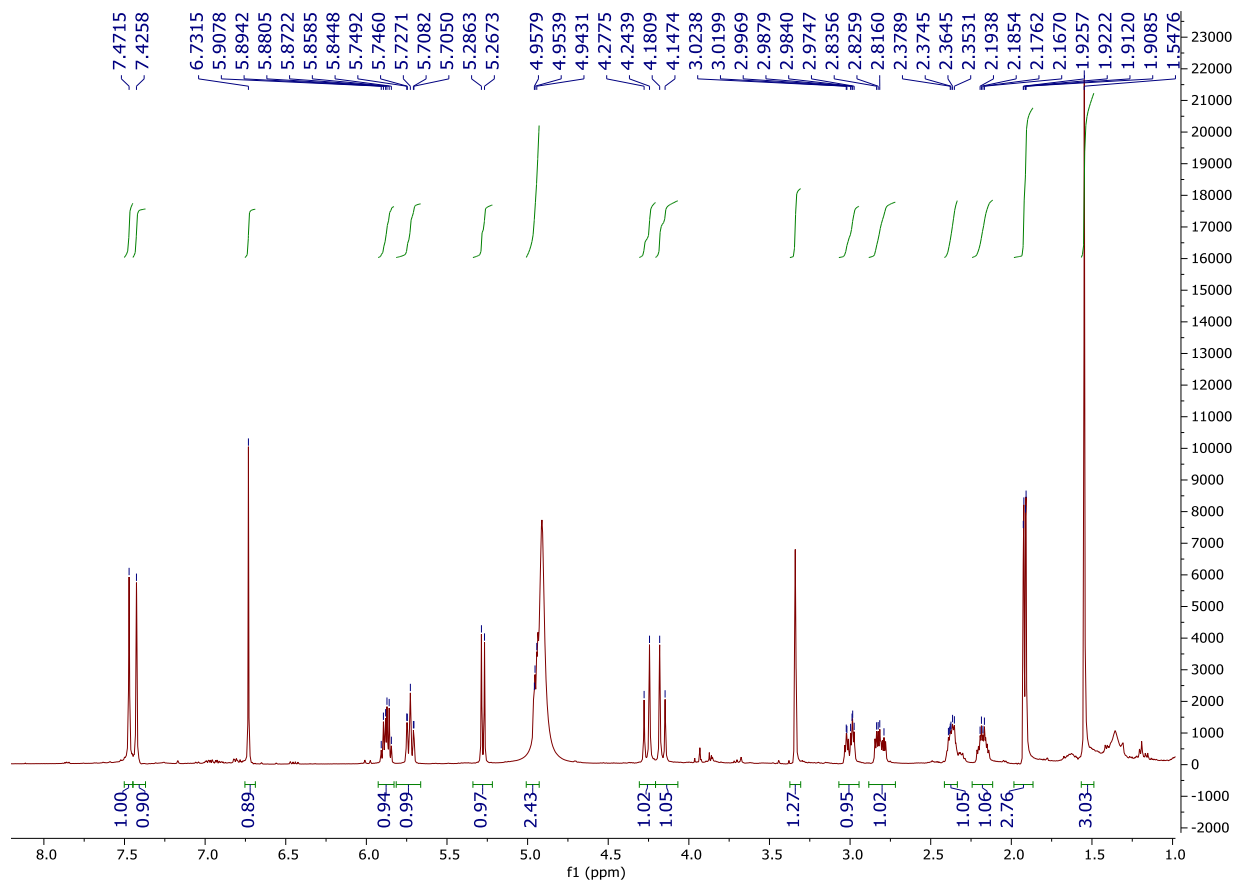

Figure S2. The <sup>1</sup>H-NMR of compound **1**

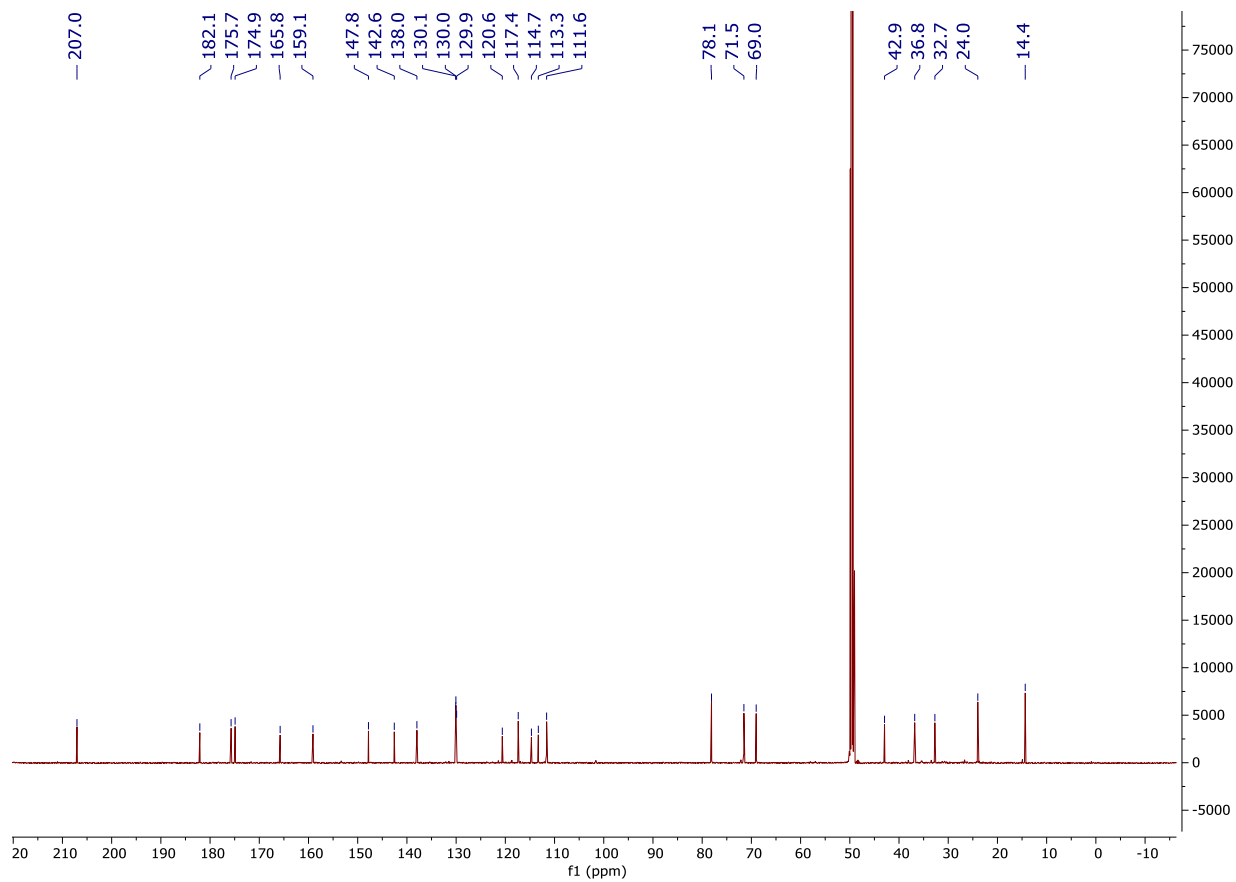

Figure S3. The  $^{13}\text{C}$ -NMR of compound **1**

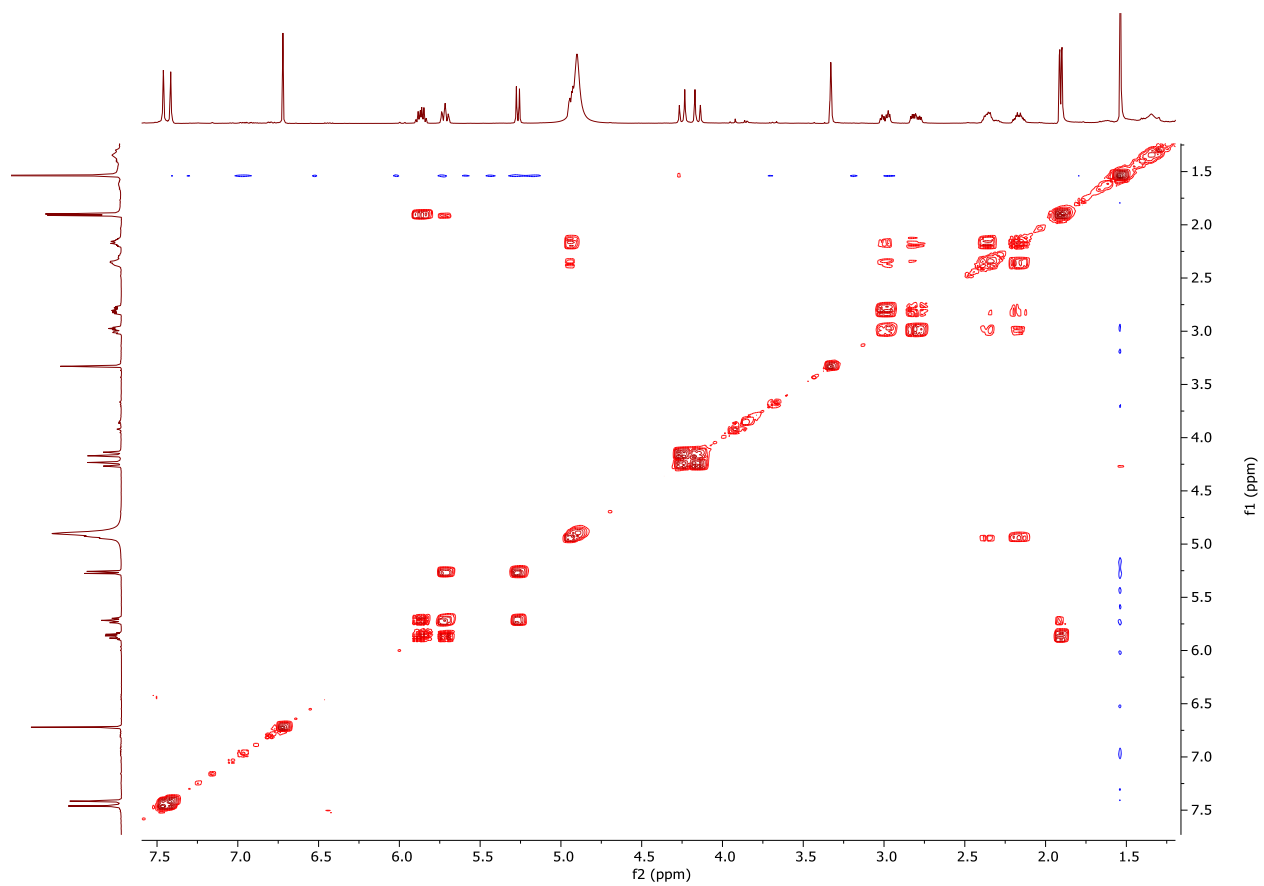

Figure S4. The  $^1\text{H}$ - $^1\text{H}$  COSY of compound **1**

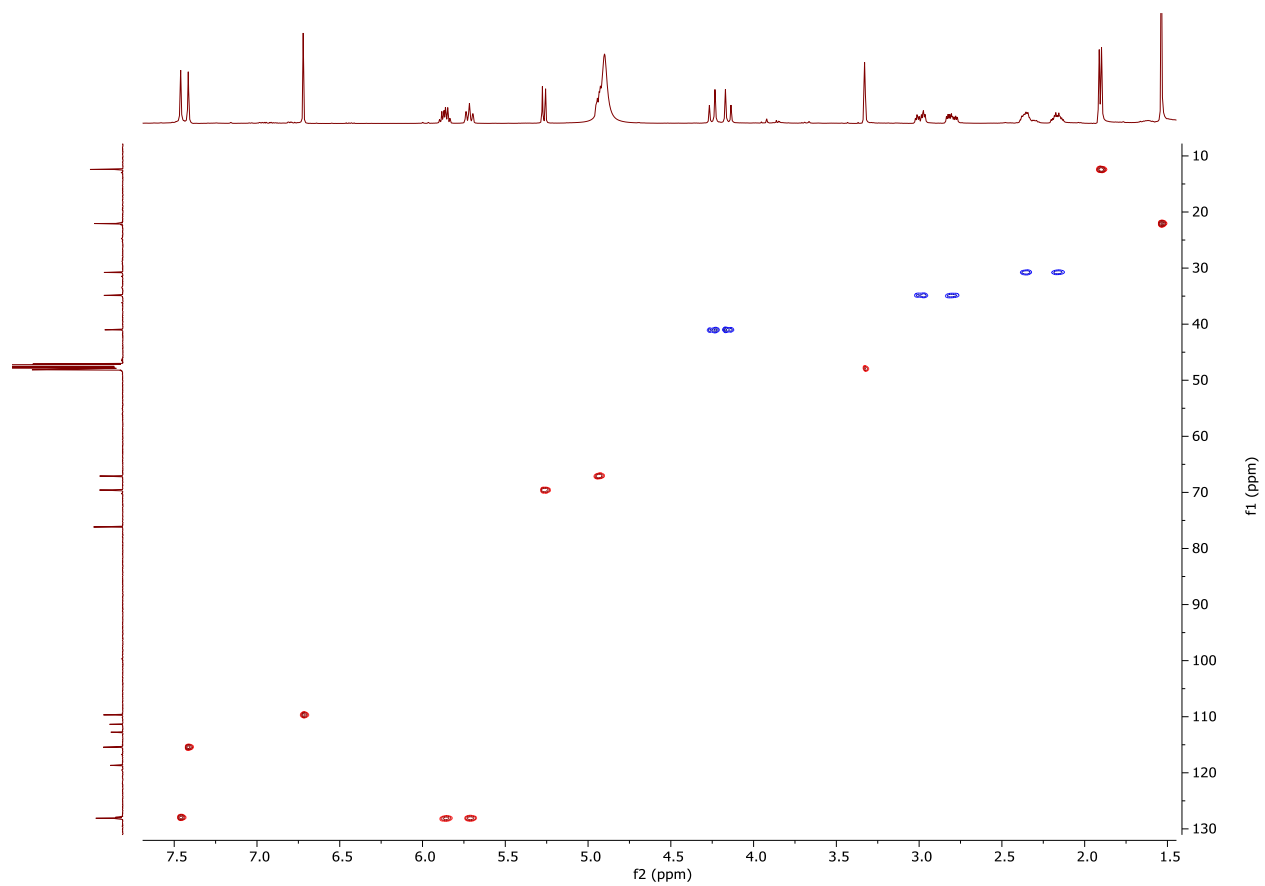

Figure S5. The HSQC of compound **1**

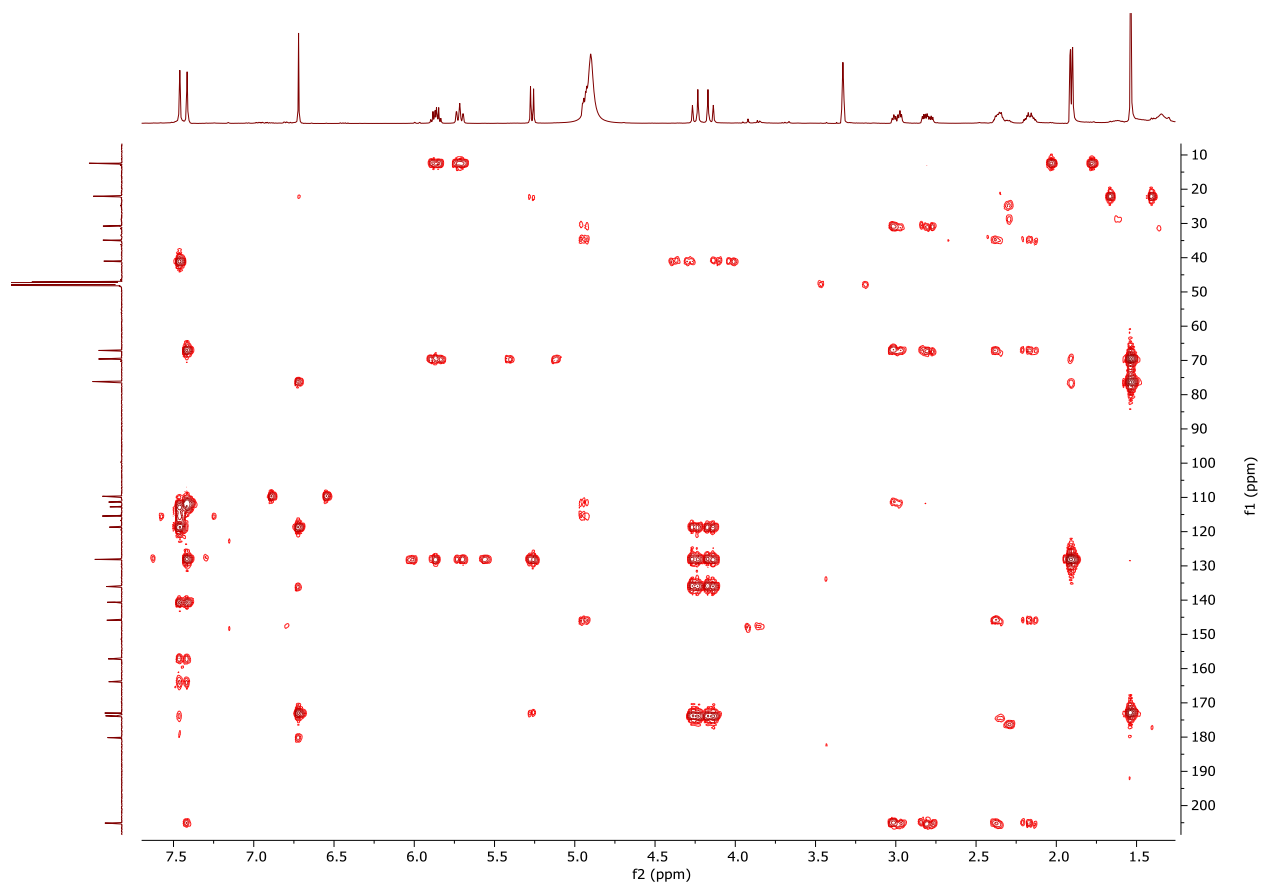

Figure S6. The HMBC of compound **1**

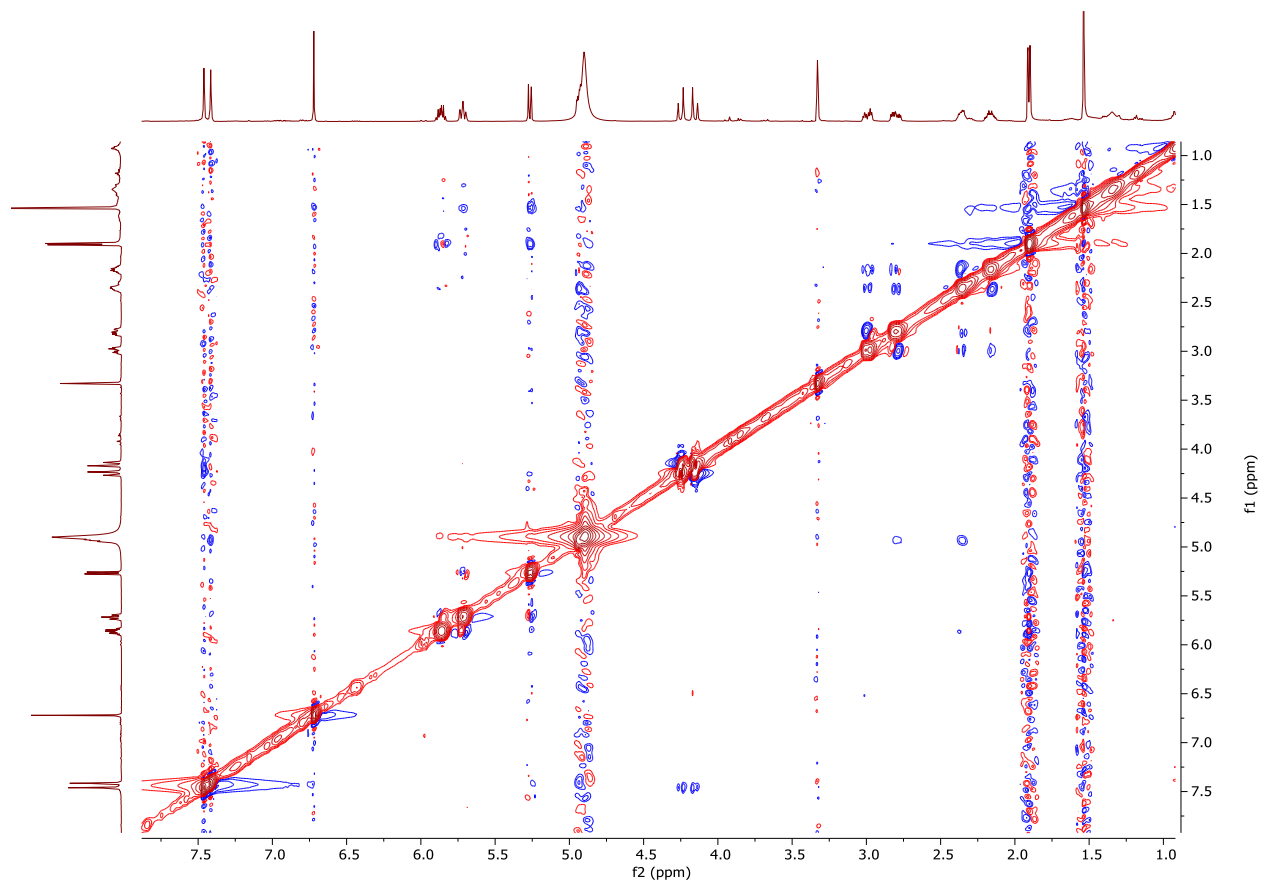

Figure S7. The NOESY of compound **1**

20191108SH-2\_20191108180944 #1 RT: 0.03 AV: 1 NL: 1.16E5  
T: FTMS + p ESI Full ms [100.0000-1000.0000]

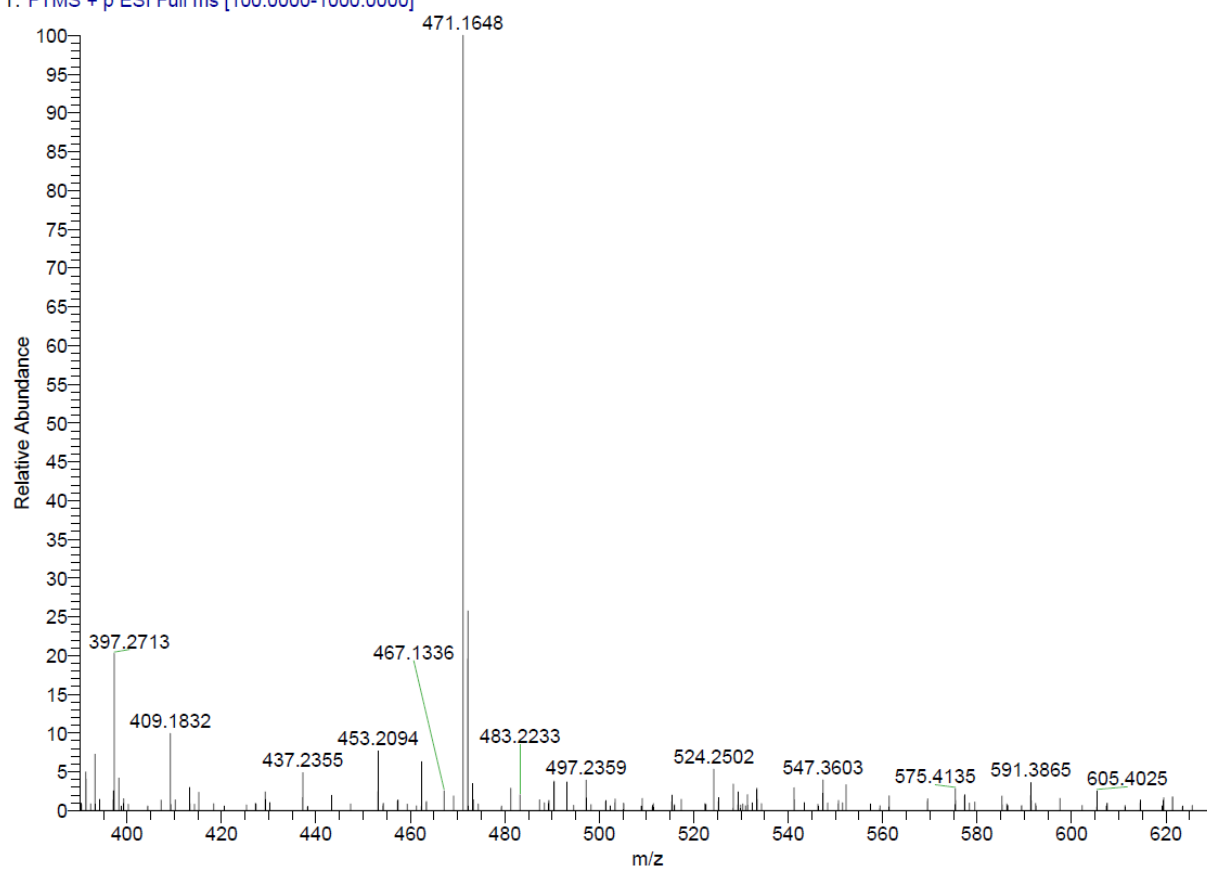

Figure S8. The HR-MS of compound 2



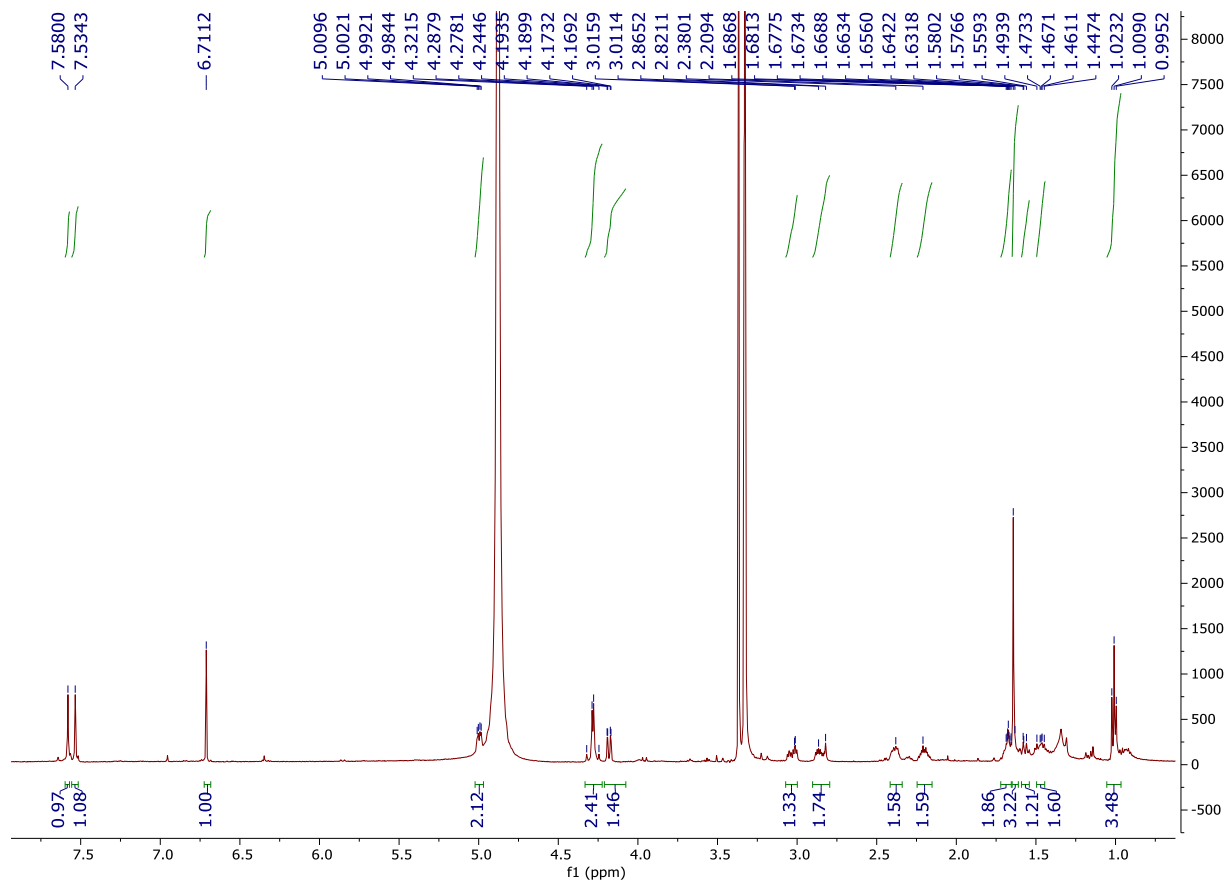

Figure S9. The  $^1\text{H-NMR}$  of compound **2**

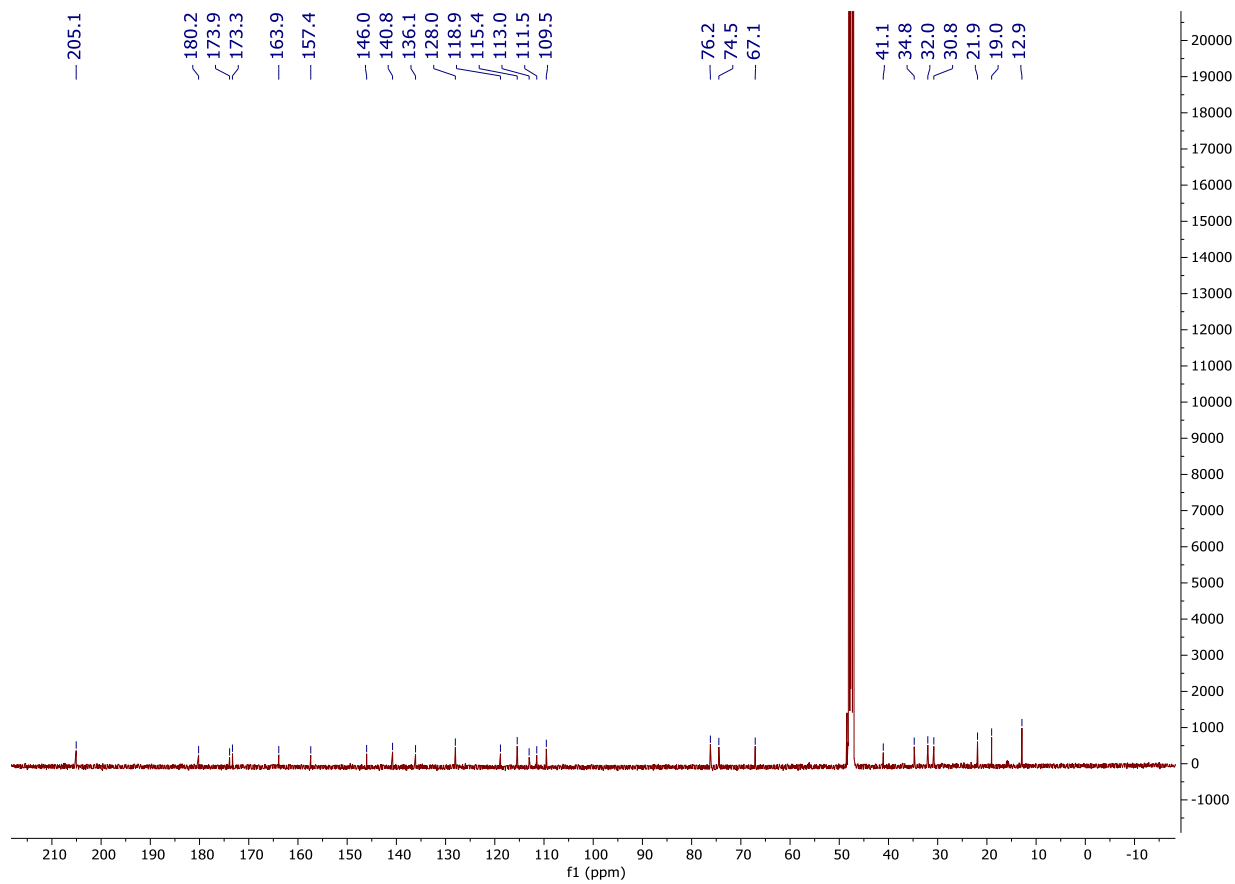

Figure S10. The  $^{13}\text{C}$ -NMR of compound **2**

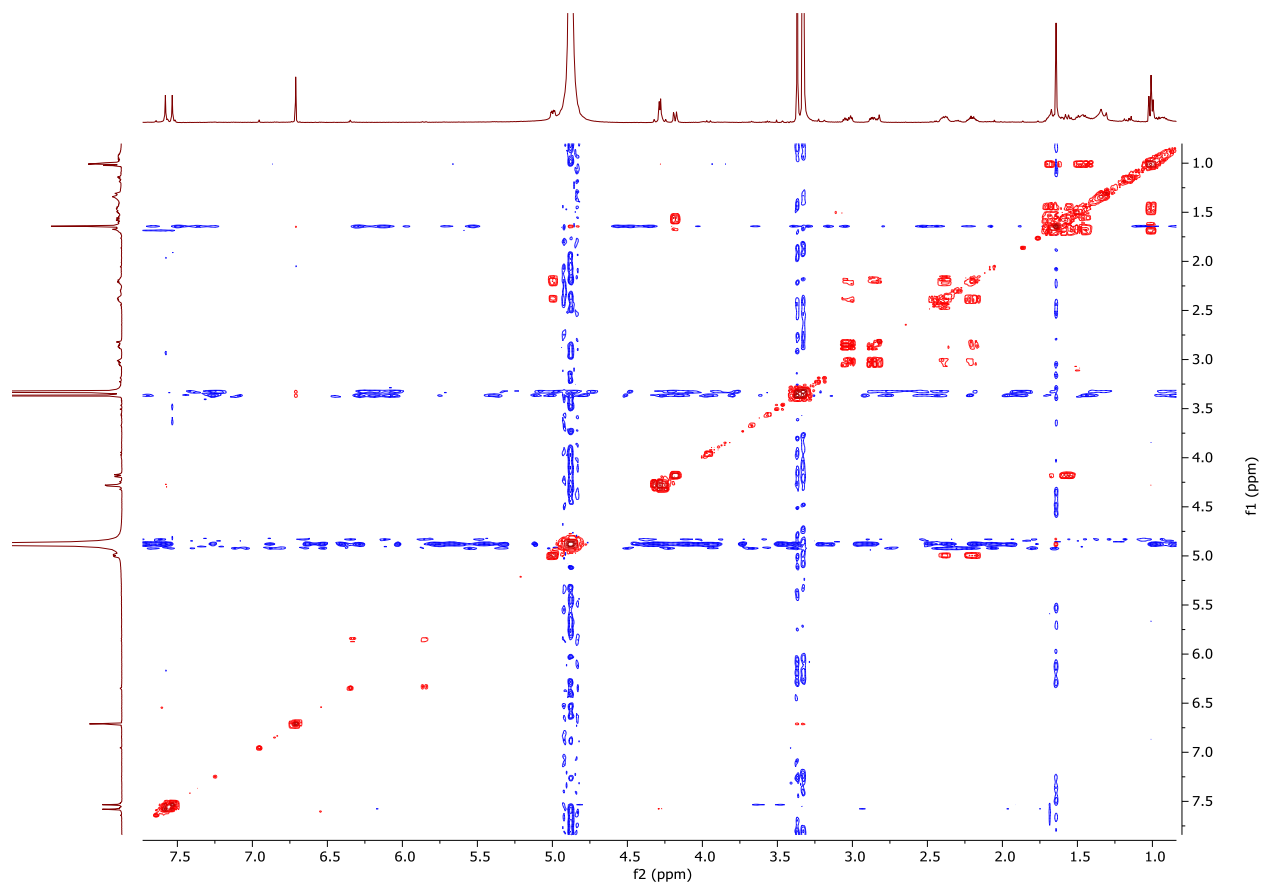

Figure S11. The  $^1\text{H}$ - $^1\text{H}$  COSY of compound **2**

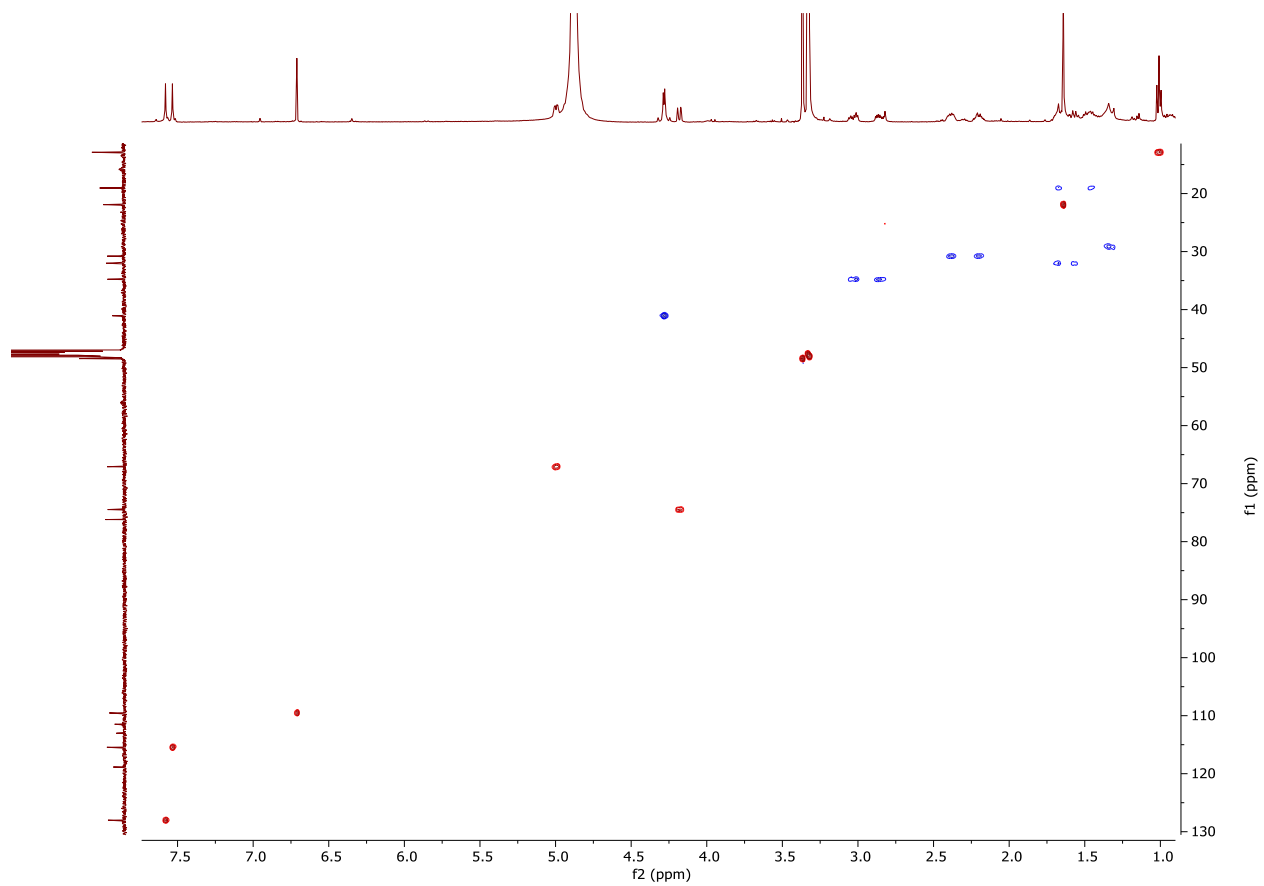

Figure S12. The HSQC of compound **2**

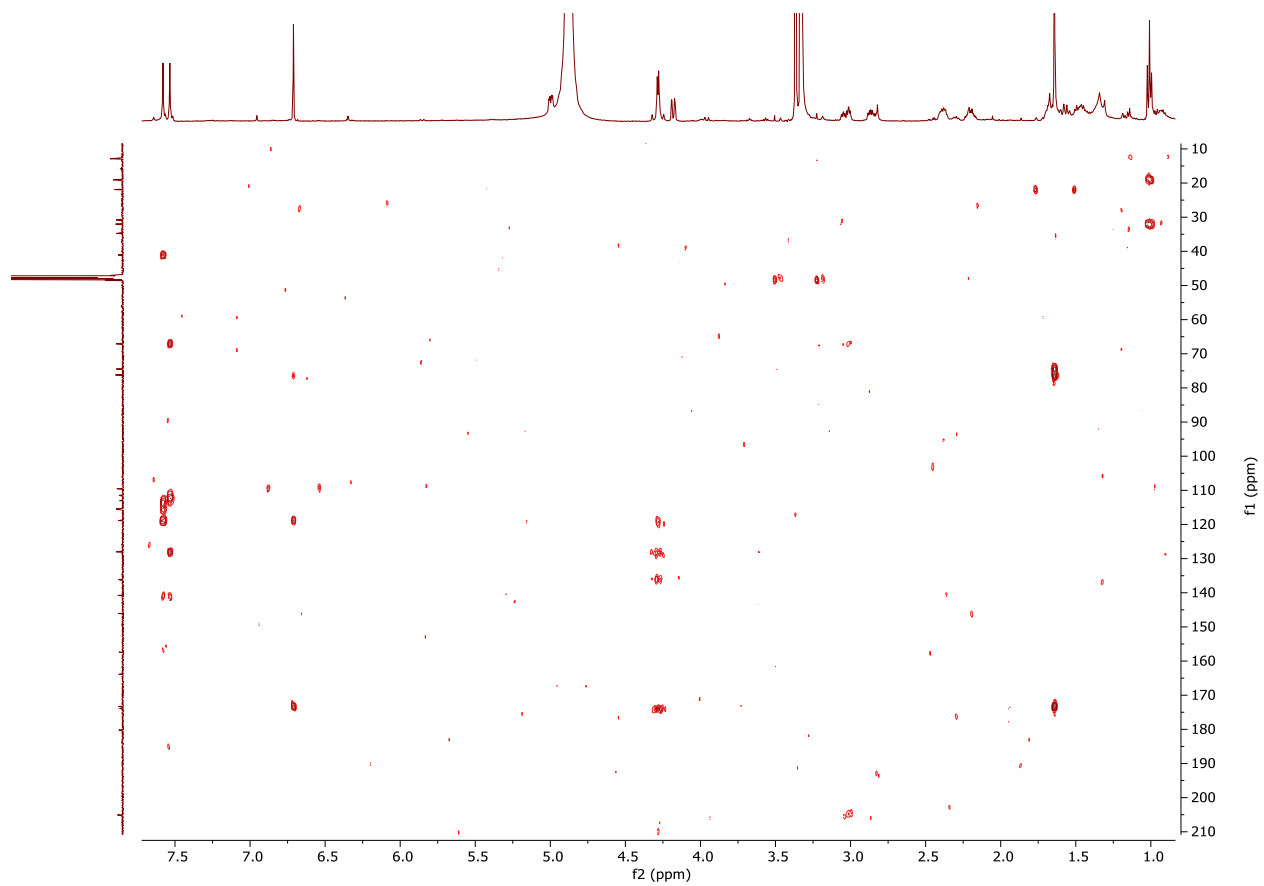

Figure S13. The HMBC of compound **2**

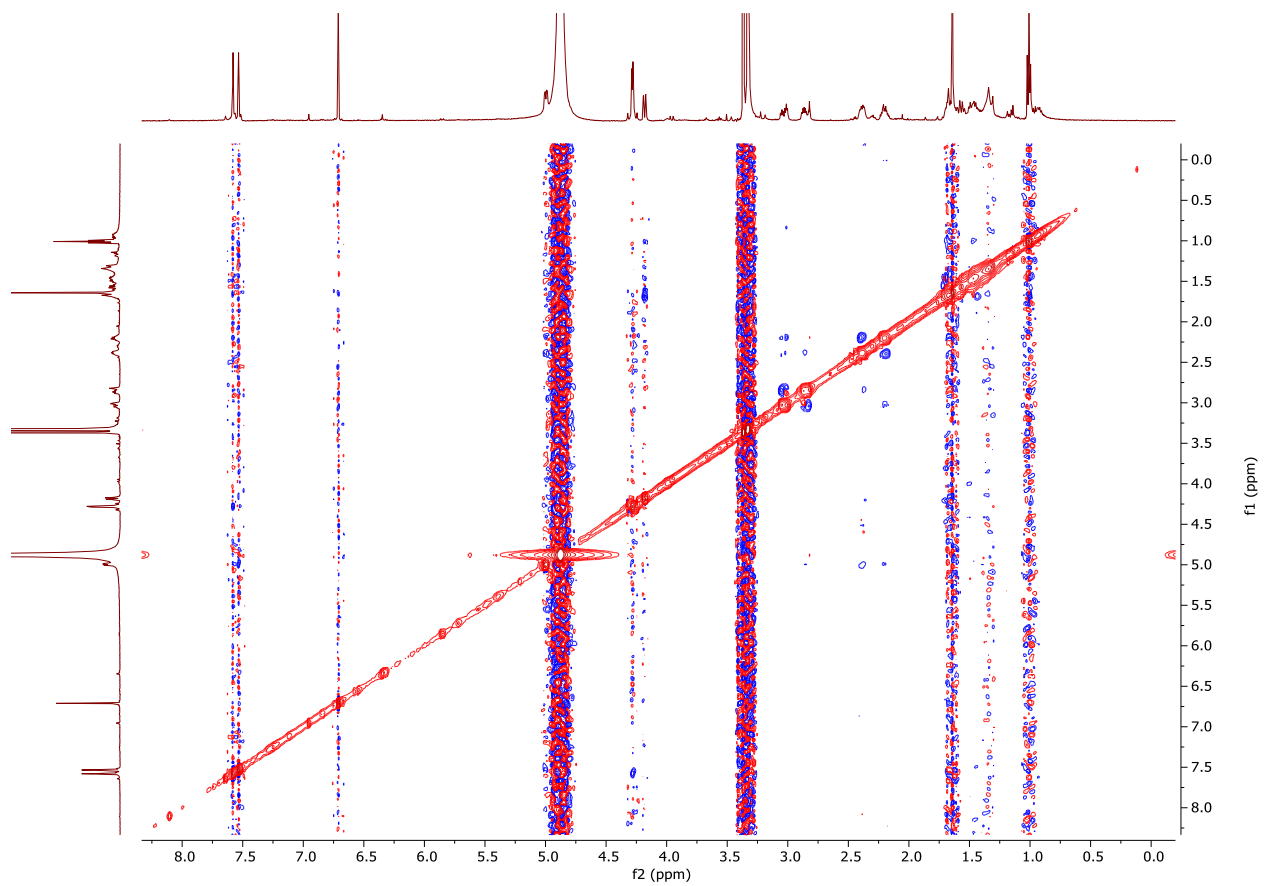

Figure S14. The NOESY of compound **2**

20191108SH-3 #1 RT: 0.03 AV: 1 NL: 1.76E5  
T: FTMS + p ESI Full ms [100.0000-1000.0000]

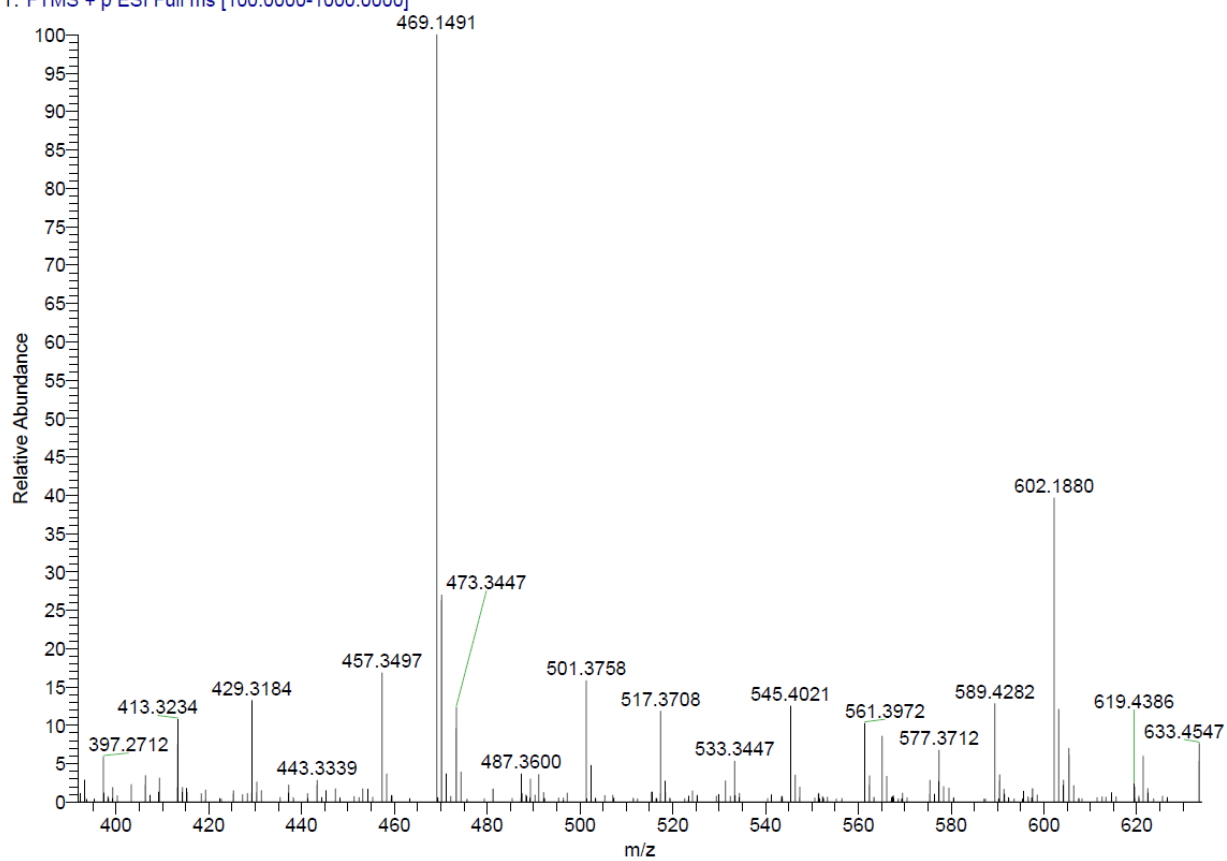

Figure S15. The HR-MS of compound **3**

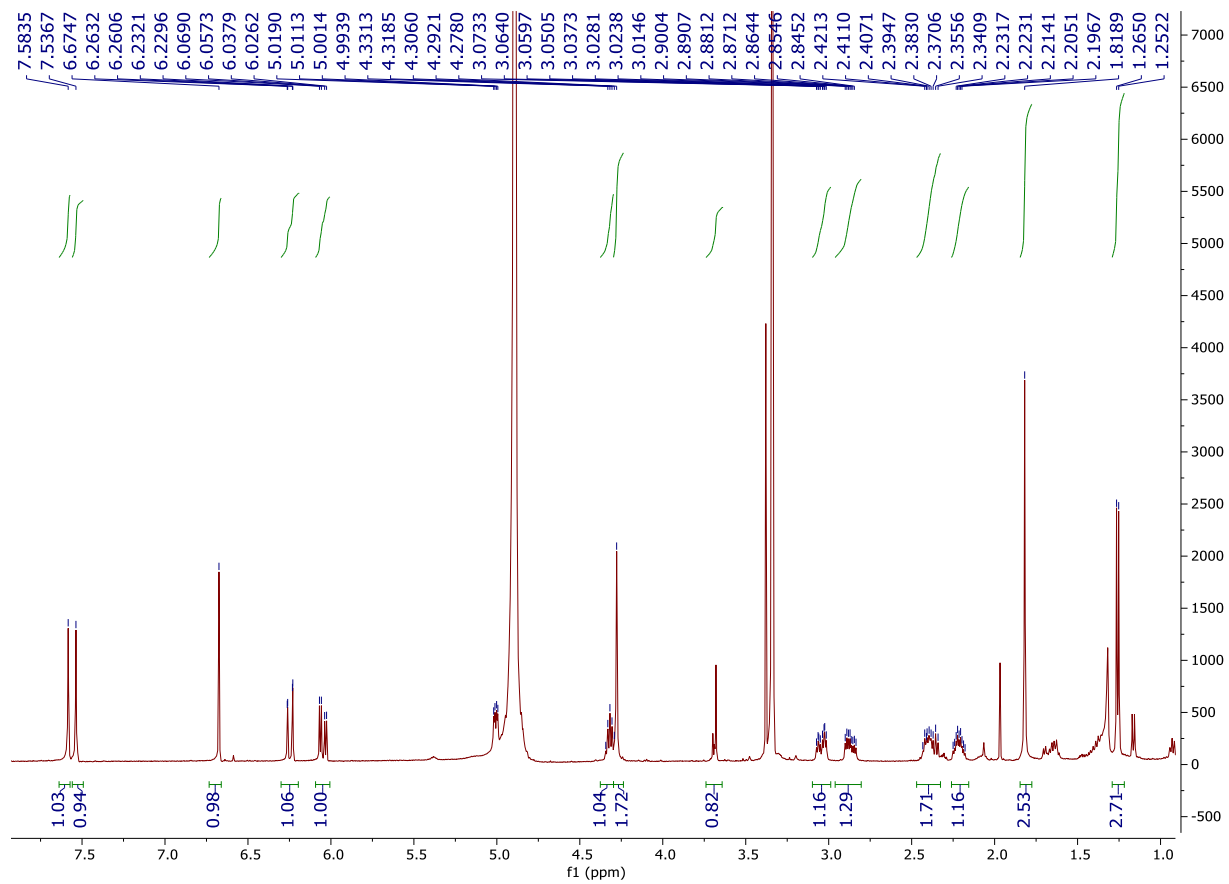

Figure S23. The <sup>1</sup>H-NMR of compound 3



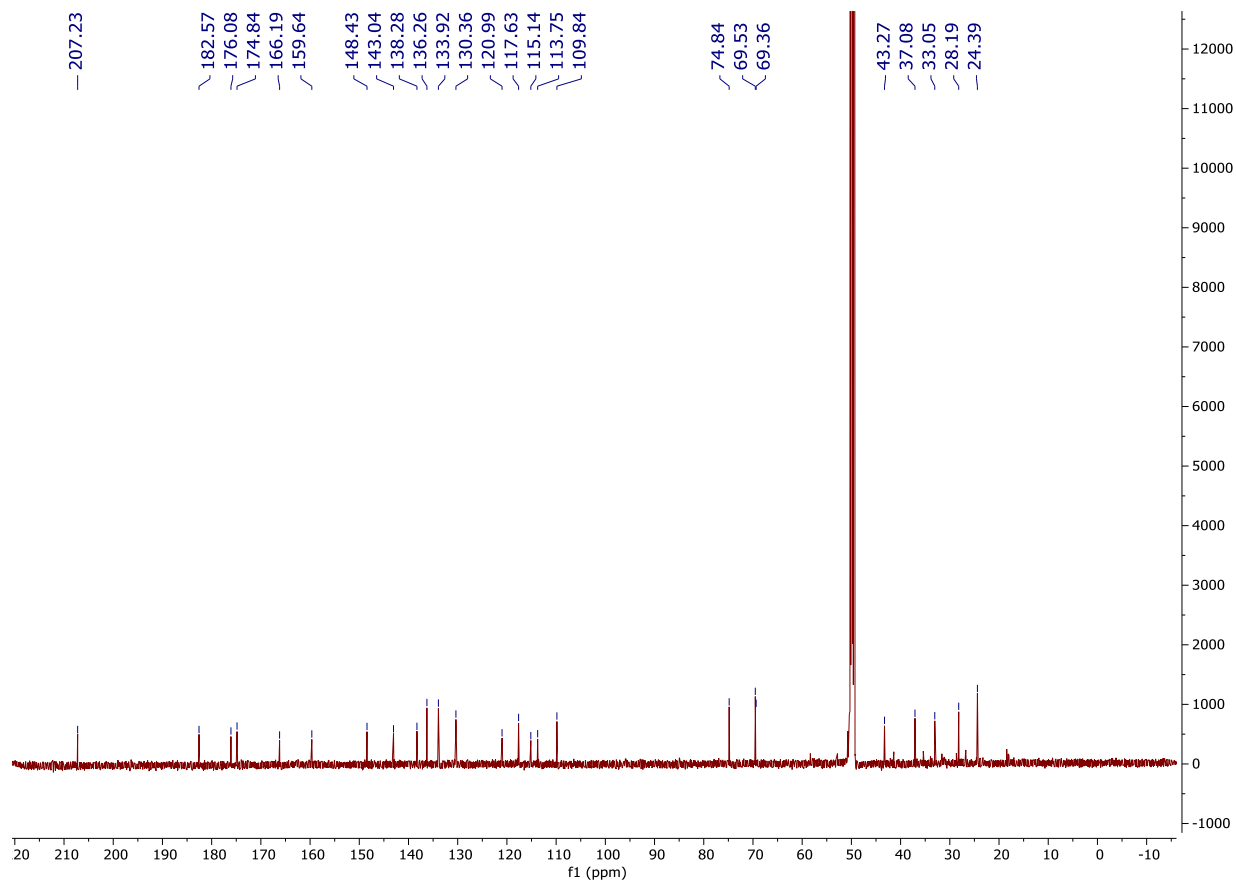

Figure S24. The  $^{13}\text{C}$ -NMR of compound **3**

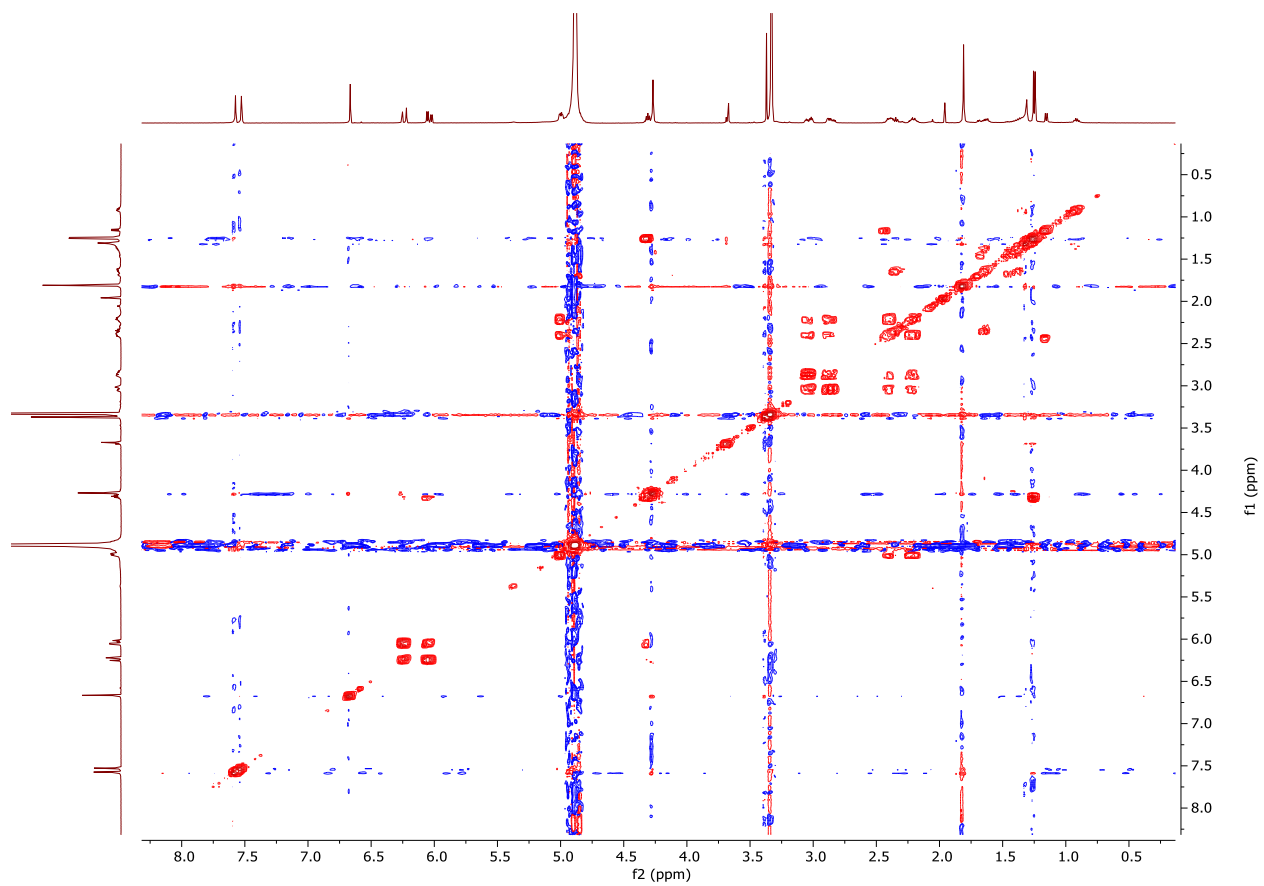

Figure S25. The  $^1\text{H}$ - $^1\text{H}$  COSY of compound **3**

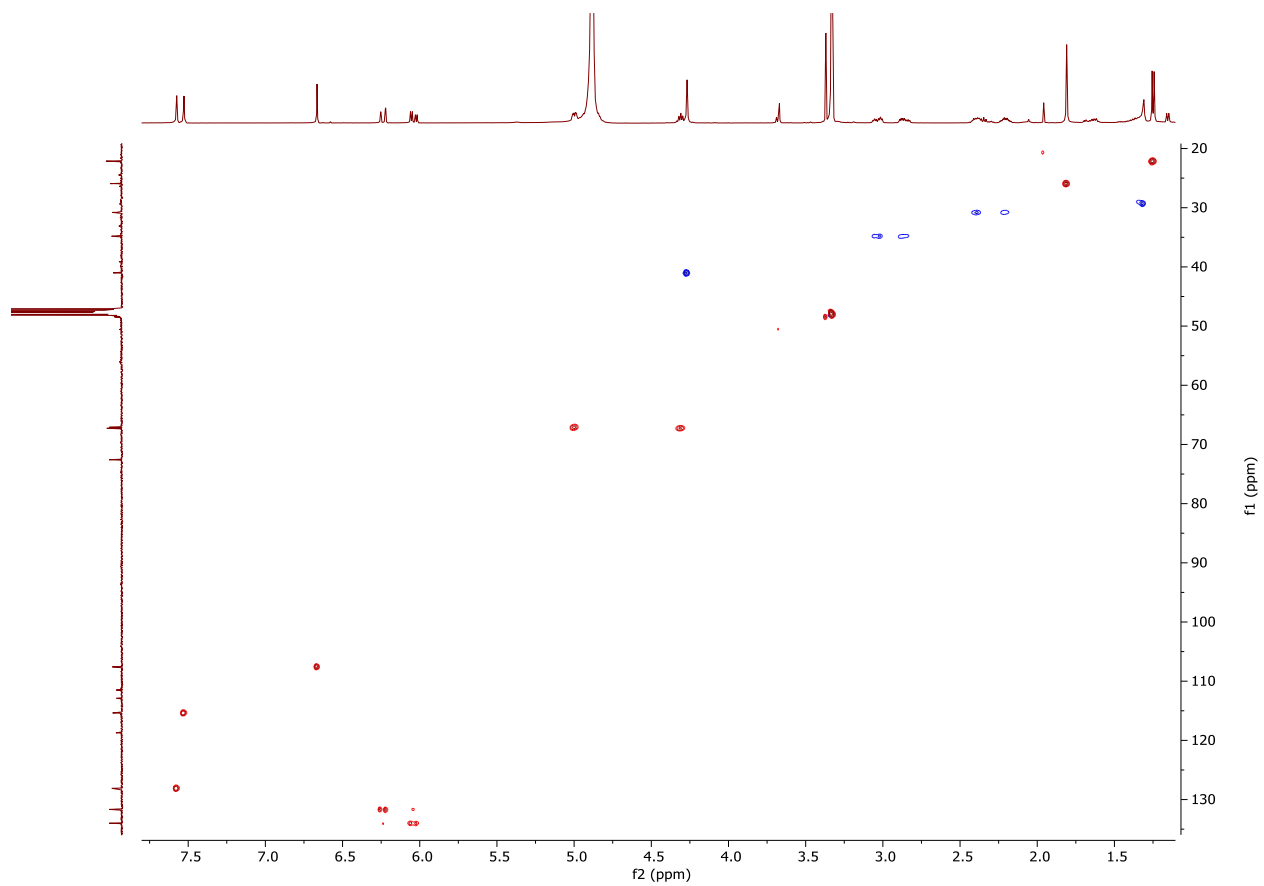

Figure S26. The HSQC of compound **3**

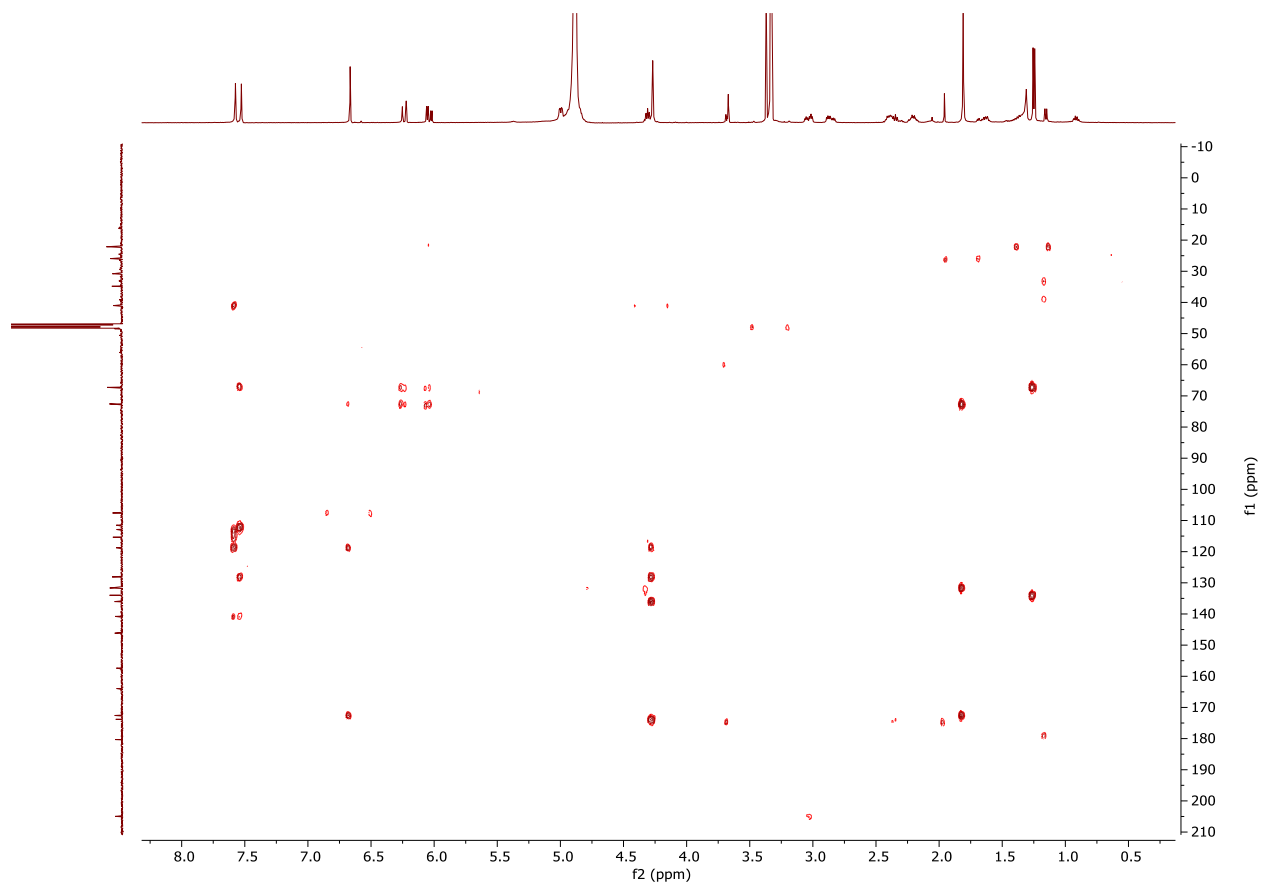

Figure S27. The HMBC of compound **3**

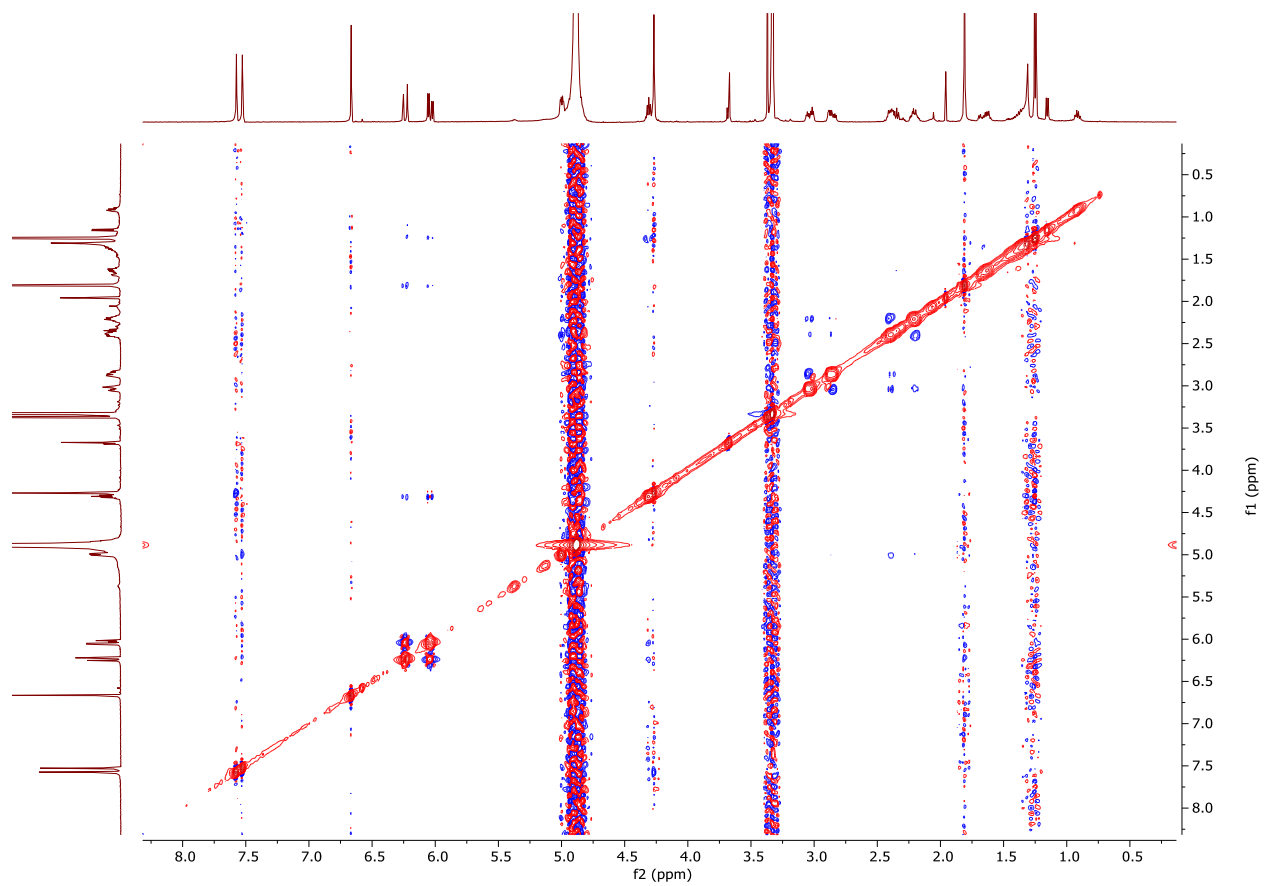

Figure S28. The NOESY of compound **3**

20191108SH-4 #1 RT: 0.03 AV: 1 NL: 1.51E5  
T: FTMS + p ESI Full ms [100.0000-1000.0000]

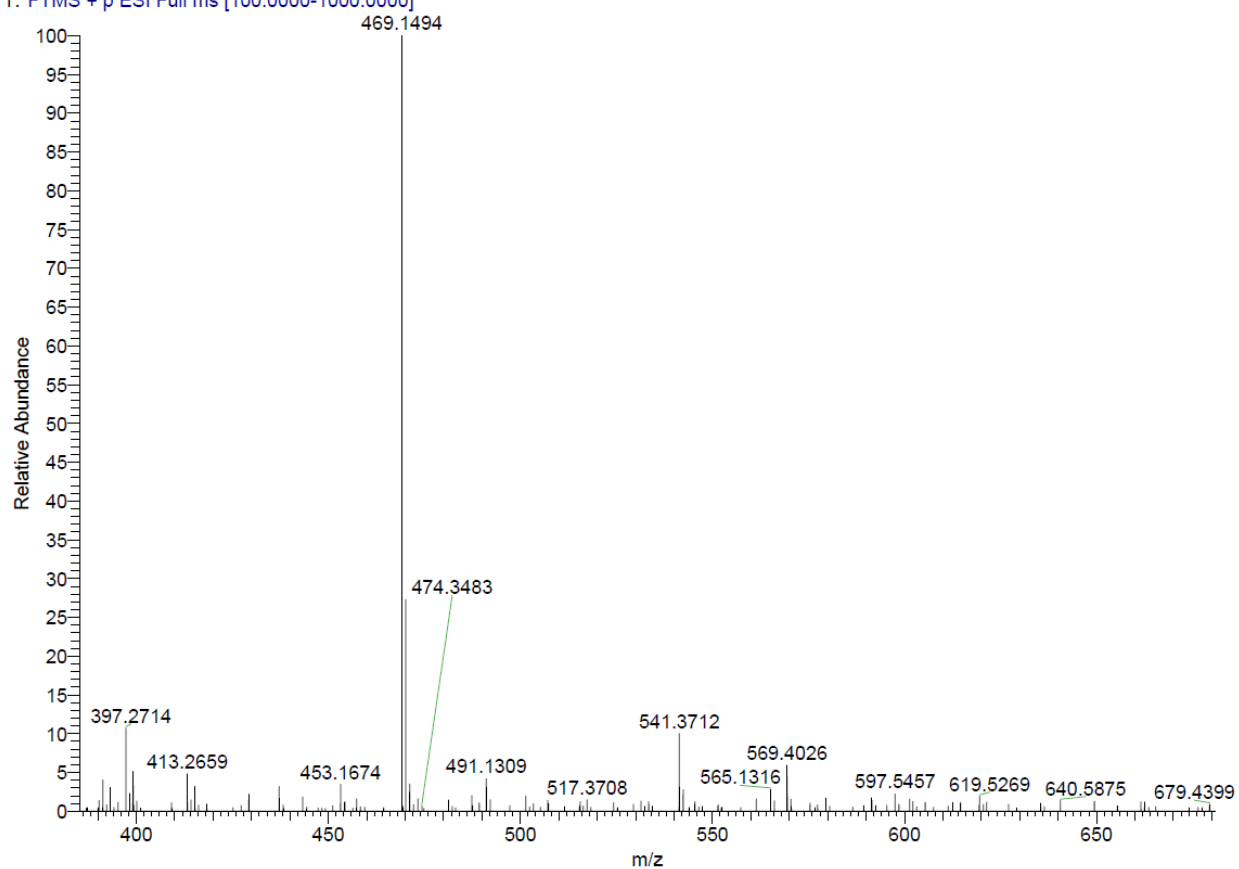

Figure S22. The HR-MS of compound **4**

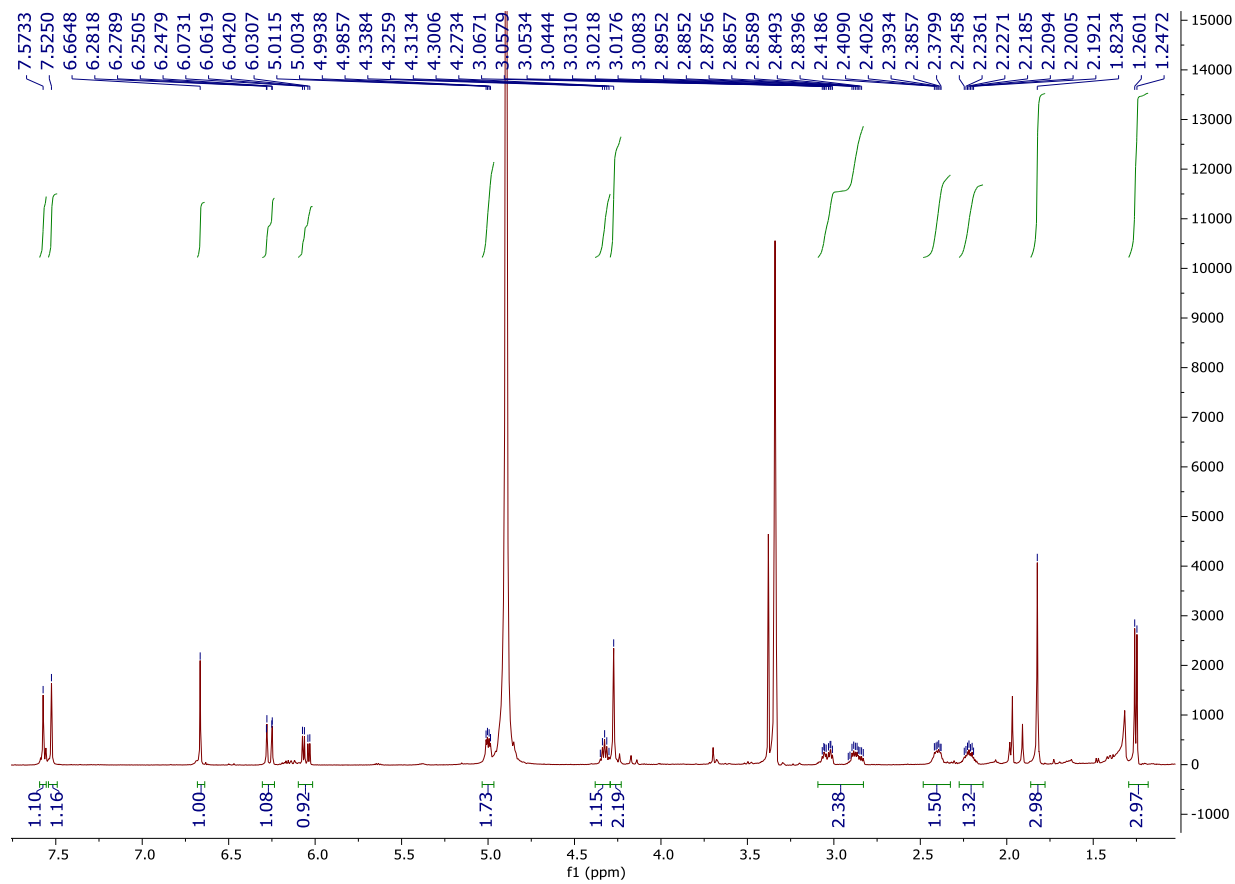

Figure S16. The  $^1\text{H}$ -NMR of compound **4**

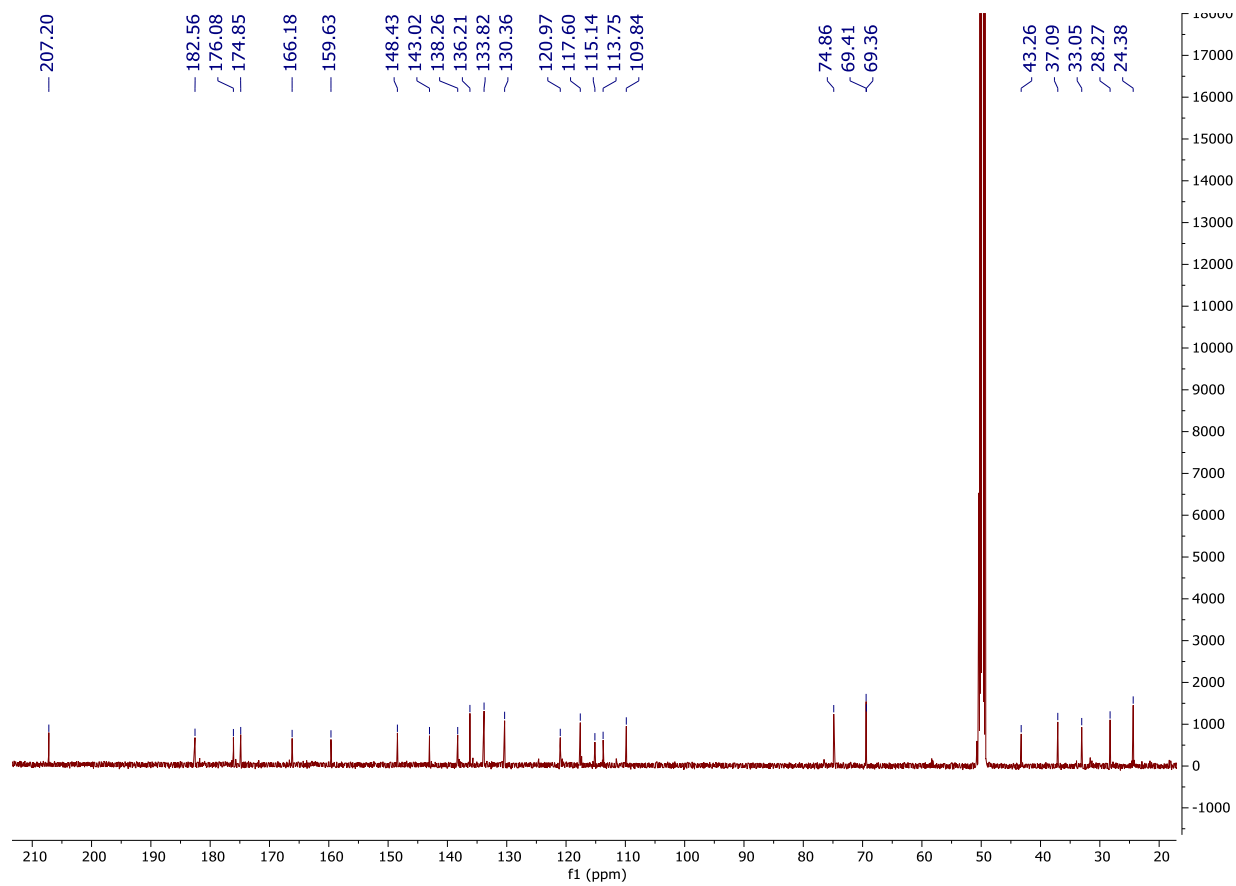

Figure S17. The  $^{13}\text{C}$ -NMR of compound **4**





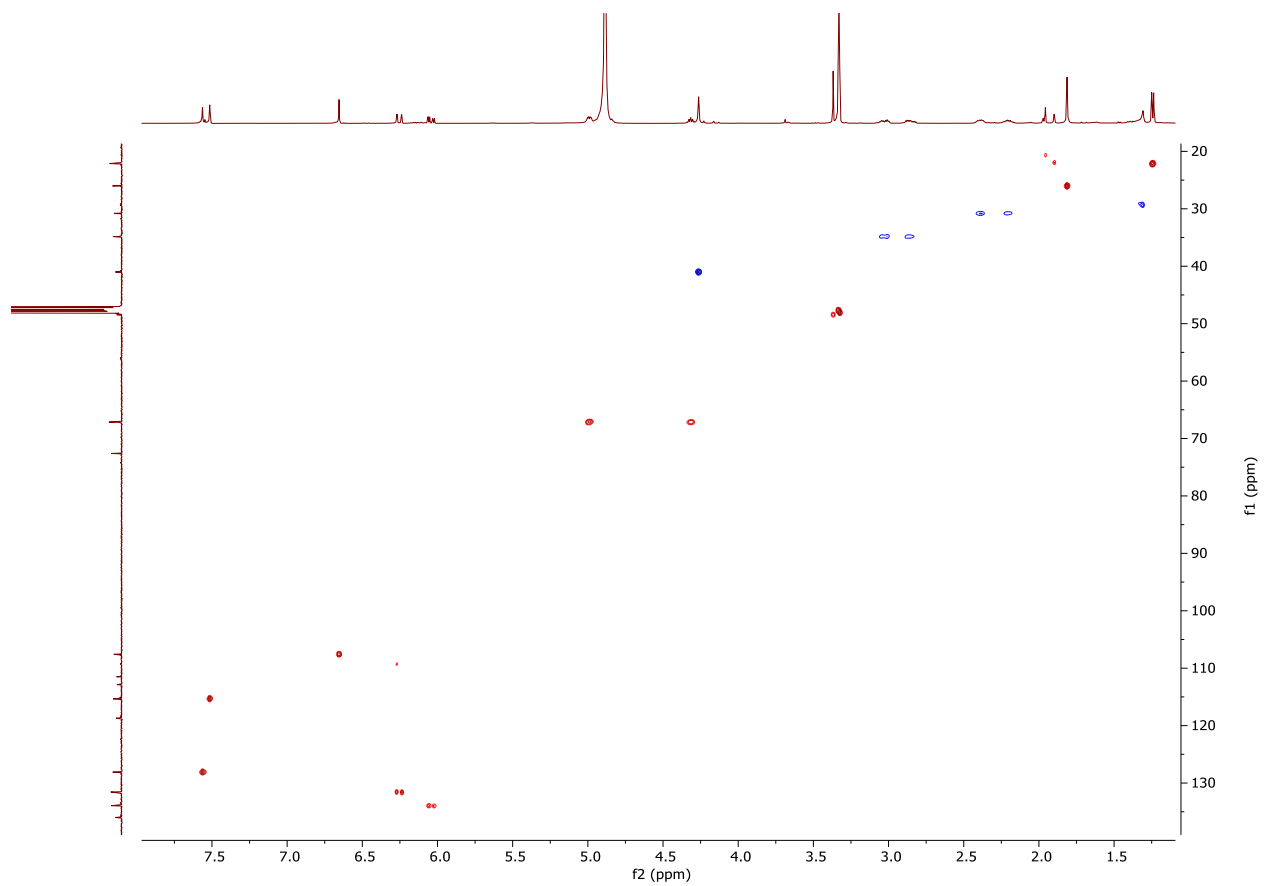

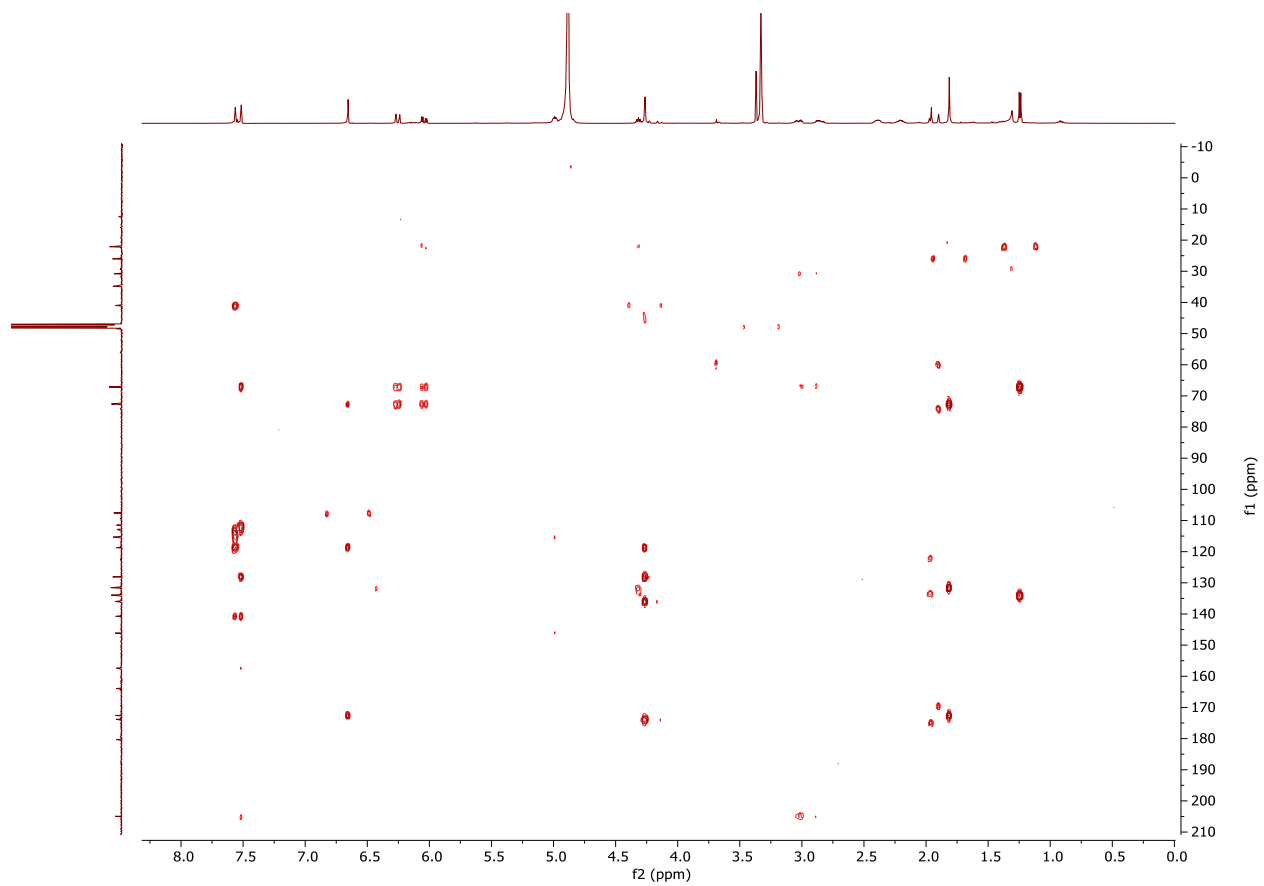

Figure S20. The HMBC of compound **4**

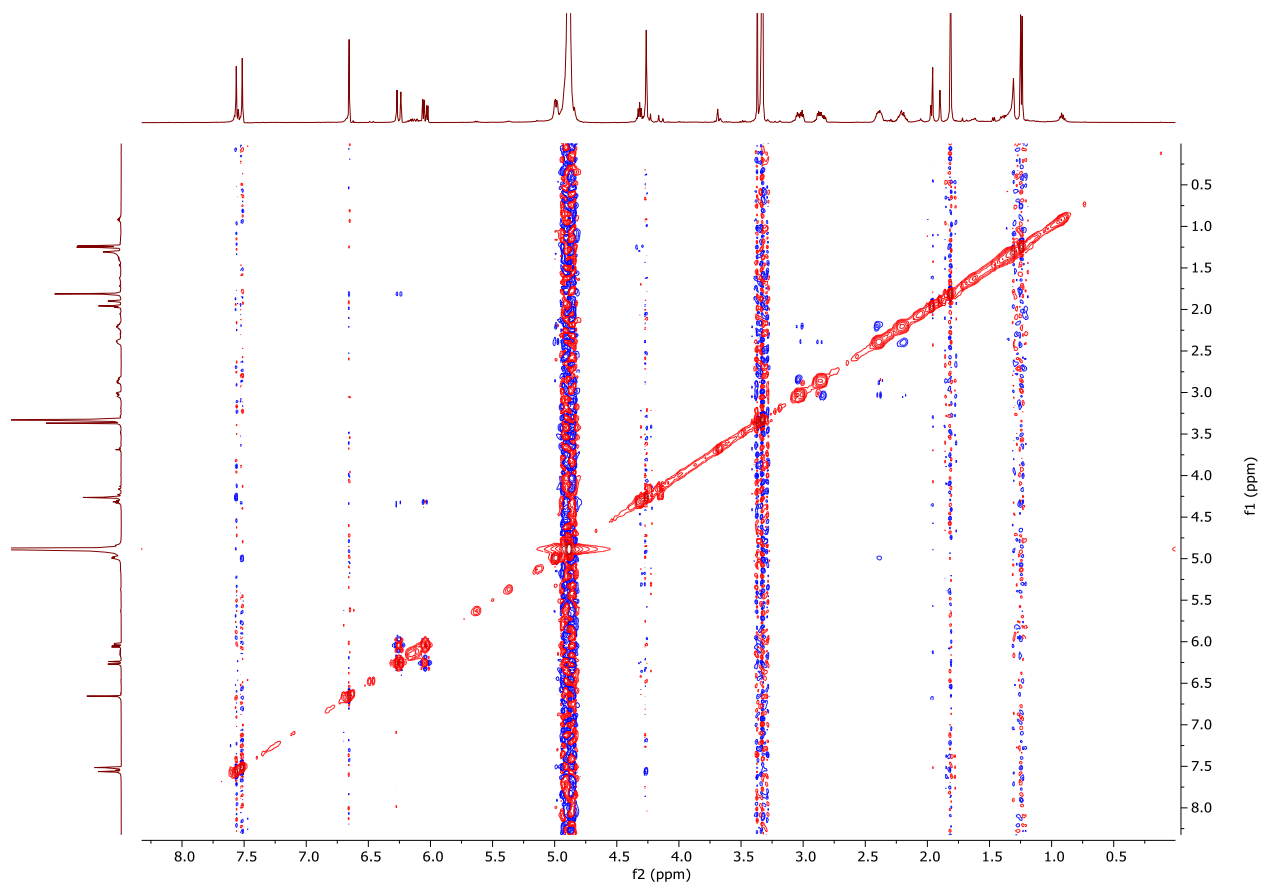

Figure S21. The NOESY of compound **4**

16S ribosomal RNA of *Streptomyces* sp. shell-016, partial sequence

ATGCAGTCGACGATGAACCGGTTTCGGCCGGGGATTAGTGGCGAACGGGTGAGTAA  
CACGTGGGCAATCTGCCCTGCACTCTGGGACAAGCCCTGGAAACGGGGTCTAATAC  
CGGATATGAACCTGGAAGGCATCTTCCGGGTTGTAAAGCTCCGGCGGTGCAGGATG  
AGCCCGCGGCCTATCAGCTTGTGGTGAGGTAACGGCTCACCAAGGCGACGACGGG  
TAGCCGGCCTGAGAGGGCGACCGGCCACACTGGGACTGAGACACGGCCCAGACTCC  
TACGGGGAGGCAGCAGTGGGGAATATTGCACAATGGGCGAAAGCCTGATGCAGCGA  
CGCCGCGTGAGGGATGACGGCCTTCGGGTTGTAAACCTCTTTCAGCAGGGAAGAAG  
CGAAAGTGACGGTACCTGCAGAAGAAGCGCCGGCTAACTACGTGCCAGCAGCCGCG  
GTAATACGTAGGGCGCAAGCGTTGTCCGGAATTATTGGGCGTAAAGAGCTCGTAGG  
CGGCTTGTACGTCGGTTGTGAAAGCCCGGGGCTTAACCCCGGGTCTGCAGTCGATA  
CGGGCAGGCTAGAGTTCGGTAGGGGAGATCGGAATTC<sub>c</sub>TGGTGTAGCGGTGAAATG  
CGCAGATATCAGGAGGAACACCGGTGGCGAAGGCGGATCTCTGGGCCGATACTGAC  
GCTGAGGAGCGAAAGCGTGGGGAGCGAACAGGATTAGATACCCTGGTAGTCCACGC  
CGTAAACGGTGGGCACTAGGTGTGGGCAACATTCCACGTTGTCCGTGCCGCAGCTAA  
CGCATTAAAGTGCCCCGCCTGGGGAGTACGGCCGCAAGGCTAAAACCTCAAAGGAATT  
GACGGGGGGCCCGCACAAAGCGGCGGAGCATGTGGCTTAATTCGACGCAACGCGAAGA  
ACCTTACCAAGGCTTGACATACACCGGAAAGCATTAGAGATAGTGCCCCCCTTGTGG  
TCGGTGTACAGGTGGTGCATGGCTGTCGTCAGCTCGTGTGTCGTGAGATGTTGGGTAA  
GTCCCGCAACGAGCGCAACCCTTGTCCCGTGTTGCCAGCAGGCCCTTGTGGTGCTGG  
GGACTCACGGGAGACCGCCGGGGTCAACTCGGAGGAAGGTGGGGACGACGTCAAG  
TCATCATGCCCCTTATGTCTTGGGCTGCACACGTGCTACAATGGCCGGTACAATGAG  
CTGCGATAACGCGAGGTGGAGCGAATCTCAAAAAGCCGGTCTCAGTTCGGATTGGG  
GTCTGCAACTCGACCCCATGAAGTCGGAGTCGCTAGTAATCGCAGATCAGCATTGCT  
GCGGTGAATACGTTCCCGGGCCTTGTACACACCGCCCGTCACGTCACGAAAGTCGGT  
AACACCCGAAGCCGGTGGCCCAACCCCTTGTGGGAGGGAGC

## Crystal Structure Reports

### **Experimental Summary**

The single crystal X-ray diffraction studies were carried out on a Bruker Kappa Photon II CPAD diffractometer equipped with Cu K $_{\alpha}$  radiation ( $\lambda = 1.54178$ ). A 0.217 x 0.114 x 0.096 mm piece of an orange rod was mounted on a Cryoloop with Paratone oil. Data were collected in a nitrogen gas stream at 100(2) K using  $\phi$  and  $\omega$  scans. Crystal-to-detector distance was 50 mm using variable exposure time (10s-60s) depending on  $\theta$  with a scan width of 1.0°. Data collection was 89.2% complete to 59.031° in  $\theta$ , (0.90 Å). A total of 14220 reflections were collected covering the indices,  $-10 \leq h \leq 10$ ,  $-12 \leq k \leq 12$ ,  $-13 \leq l \leq 12$ . 5334 reflections were found to be symmetry independent, with a  $R_{\text{int}}$  of 0.0251. Indexing and unit cell refinement indicated a primitive, triclinic lattice. The space group was found to be  $P1$ . The data were integrated using the Bruker SAINT software program and scaled using the SADABS software program. Solution by direct methods (SHELXT) produced a complete phasing model for refinement.

All nonhydrogen atoms were refined anisotropically by full-matrix least-squares (SHELXL-2014). All hydrogen atoms were placed using a riding model. Their positions were constrained relative to their parent atom using the appropriate HFIX command in SHELXL-2014. The absolute stereochemistry of the molecule was established by anomalous dispersion using the Parson's method with a Flack parameter of 0.020(73). Crystallographic data are summarized in Table 1.

C  
H  
O

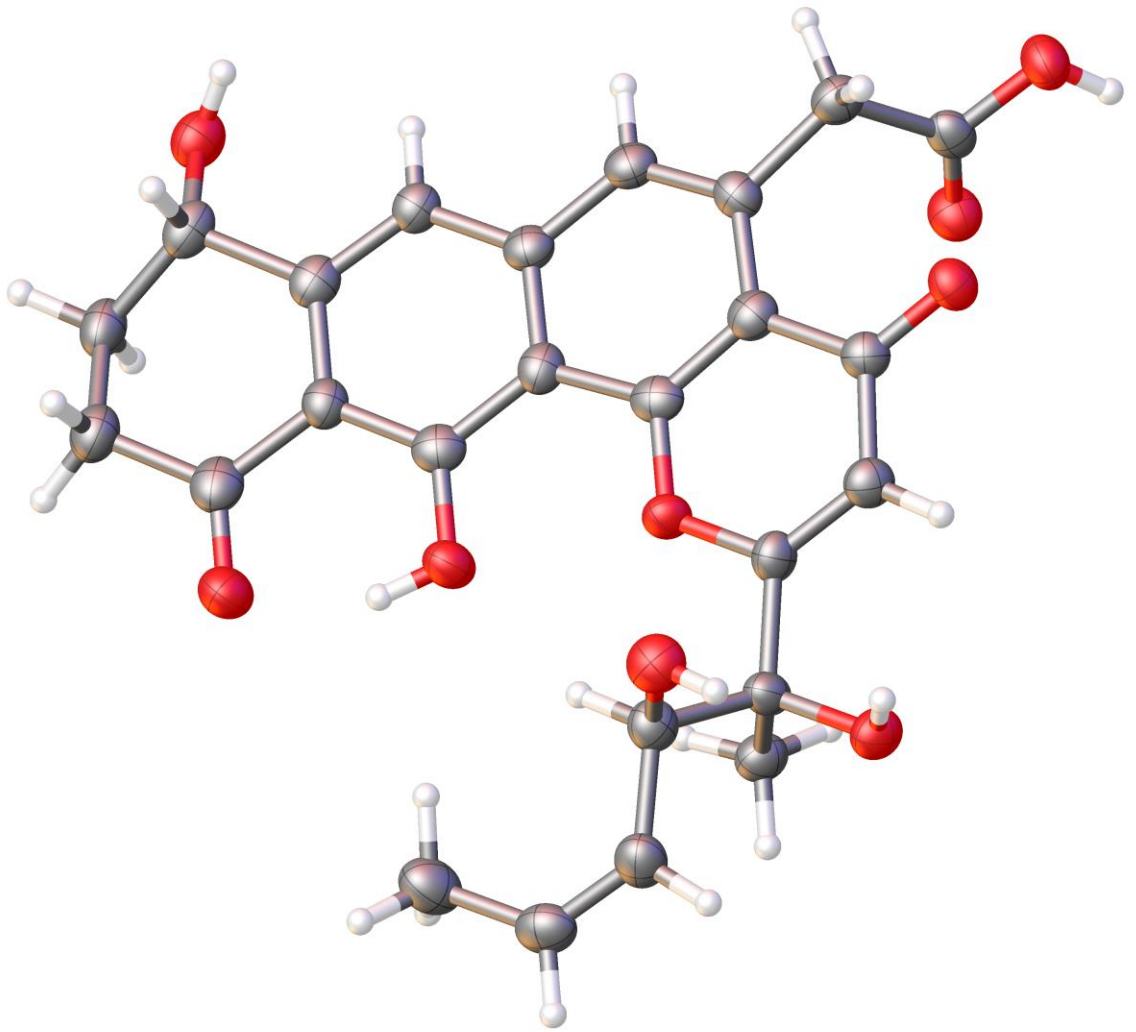

Table 1. Crystal data and structure refinement for SHELLMYCINA.

|                                   |                                                                                                                             |                 |
|-----------------------------------|-----------------------------------------------------------------------------------------------------------------------------|-----------------|
| Report date                       | 2019-12-05                                                                                                                  |                 |
| Identification code               | SHELLMYCINA                                                                                                                 |                 |
| Empirical formula                 | C <sub>26.20</sub> H <sub>28.40</sub> O <sub>10</sub>                                                                       |                 |
| Molecular formula                 | C <sub>25</sub> H <sub>24</sub> O <sub>9</sub> , 0.8(C <sub>4</sub> H <sub>4</sub> O), 0.2(C <sub>2</sub> H <sub>6</sub> O) |                 |
| Formula weight                    | 503.29                                                                                                                      |                 |
| Temperature                       | 100 K                                                                                                                       |                 |
| Wavelength                        | 1.54178 Å                                                                                                                   |                 |
| Crystal system                    | Triclinic                                                                                                                   |                 |
| Space group                       | P1                                                                                                                          |                 |
| Unit cell dimensions              | a = 9.5749(5) Å                                                                                                             | α = 65.634(3)°. |
|                                   | b = 11.5552(6) Å                                                                                                            | β = 89.720(3)°. |
|                                   | c = 11.8417(6) Å                                                                                                            | γ = 79.122(3)°. |
| Volume                            | 1168.12(11) Å <sup>3</sup>                                                                                                  |                 |
| Z                                 | 2                                                                                                                           |                 |
| Density (calculated)              | 1.431 Mg/m <sup>3</sup>                                                                                                     |                 |
| Absorption coefficient            | 0.927 mm <sup>-1</sup>                                                                                                      |                 |
| F(000)                            | 531                                                                                                                         |                 |
| Crystal size                      | 0.217 x 0.114 x 0.096 mm <sup>3</sup>                                                                                       |                 |
| Crystal color, habit              | Orange Rod                                                                                                                  |                 |
| Theta range for data collection   | 4.112 to 59.031°.                                                                                                           |                 |
| Index ranges                      | -10 ≤ h ≤ 10, -12 ≤ k ≤ 12, -13 ≤ l ≤ 12                                                                                    |                 |
| Reflections collected             | 14220                                                                                                                       |                 |
| Independent reflections           | 5334 [R(int) = 0.0251, R(sigma) = 0.0313]                                                                                   |                 |
| Completeness to theta = 59.031°   | 89.2 %                                                                                                                      |                 |
| Absorption correction             | Semi-empirical from equivalents                                                                                             |                 |
| Max. and min. transmission        | 0.152328 and 0.065793                                                                                                       |                 |
| Refinement method                 | Full-matrix least-squares on F <sup>2</sup>                                                                                 |                 |
| Data / restraints / parameters    | 5334 / 21 / 676                                                                                                             |                 |
| Goodness-of-fit on F <sup>2</sup> | 1.078                                                                                                                       |                 |
| Final R indices [I > 2σ(I)]       | R1 = 0.0274, wR2 = 0.0745                                                                                                   |                 |
| R indices (all data)              | R1 = 0.0282, wR2 = 0.0753                                                                                                   |                 |
| Absolute structure parameter      | 0.02(7)                                                                                                                     |                 |
| Extinction coefficient            | n/a                                                                                                                         |                 |
| Largest diff. peak and hole       | 0.190 and -0.168 e.Å <sup>-3</sup>                                                                                          |                 |



Table 2. Atomic coordinates ( $\times 10^4$ ) and equivalent isotropic displacement parameters ( $\text{\AA}^2 \times 10^3$ ) for SHELLMYCINA.  $U(\text{eq})$  is defined as one third of the trace of the orthogonalized  $U^{ij}$  tensor.

|       | x       | y        | z        | $U(\text{eq})$ |
|-------|---------|----------|----------|----------------|
| O(1)  | 5155(3) | 1211(3)  | 459(3)   | 43(1)          |
| O(2)  | 3957(3) | 3950(3)  | -229(3)  | 36(1)          |
| O(3)  | 3163(3) | 1557(3)  | 2654(3)  | 30(1)          |
| O(4)  | 5564(3) | 3248(3)  | 4091(3)  | 33(1)          |
| O(5)  | 1705(3) | -132(3)  | 2856(3)  | 35(1)          |
| O(6)  | 598(3)  | -2020(3) | 3175(3)  | 44(1)          |
| O(7)  | 576(3)  | -3325(3) | 8164(3)  | 40(1)          |
| O(8)  | 3095(3) | 3812(3)  | 5609(3)  | 37(1)          |
| O(9)  | 5141(3) | 3801(3)  | 6524(3)  | 38(1)          |
| C(1)  | 1505(5) | 467(5)   | -571(5)  | 48(1)          |
| C(2)  | 2164(5) | 1551(4)  | -1385(5) | 40(1)          |
| C(3)  | 3081(5) | 2098(4)  | -1044(4) | 38(1)          |
| C(4)  | 3656(4) | 1747(4)  | 245(4)   | 34(1)          |
| C(5)  | 3291(4) | 2938(4)  | 552(4)   | 30(1)          |
| C(6)  | 3751(4) | 2570(4)  | 1898(4)  | 30(1)          |
| C(7)  | 4546(4) | 3138(4)  | 2341(4)  | 32(1)          |
| C(8)  | 4793(4) | 2742(4)  | 3657(4)  | 28(1)          |
| C(9)  | 4077(4) | 1709(4)  | 4464(5)  | 32(1)          |
| C(10) | 3302(4) | 1149(4)  | 3907(4)  | 30(1)          |
| C(11) | 2592(4) | 107(4)   | 4608(5)  | 30(1)          |
| C(12) | 1866(4) | -545(4)  | 4085(5)  | 32(1)          |
| C(13) | 1362(4) | -1658(4) | 4878(5)  | 30(1)          |
| C(14) | 753(4)  | -2398(4) | 4317(5)  | 38(1)          |
| C(15) | 362(5)  | -3645(4) | 5155(5)  | 40(1)          |
| C(16) | -43(4)  | -3681(4) | 6415(5)  | 38(1)          |
| C(17) | 1083(4) | -3360(4) | 7041(5)  | 35(1)          |
| C(18) | 1495(4) | -2077(4) | 6183(4)  | 32(1)          |
| C(19) | 2073(4) | -1377(4) | 6678(4)  | 29(1)          |
| C(20) | 2668(4) | -316(4)  | 5914(4)  | 30(1)          |
| C(21) | 3411(4) | 318(4)   | 6458(5)  | 32(1)          |
| C(22) | 4115(4) | 1273(4)  | 5781(4)  | 29(1)          |

|        |          |          |          |       |
|--------|----------|----------|----------|-------|
| C(23)  | 4909(4)  | 1842(4)  | 6454(4)  | 34(1) |
| C(24)  | 4268(5)  | 3257(4)  | 6122(4)  | 31(1) |
| C(25)  | 1689(4)  | 3486(4)  | 349(4)   | 35(1) |
| O(1')  | 8545(3)  | 5724(2)  | 9707(3)  | 32(1) |
| O(2')  | 5680(3)  | 5848(3)  | 10063(3) | 32(1) |
| O(3')  | 6643(3)  | 8192(2)  | 7226(3)  | 29(1) |
| O(4')  | 4501(3)  | 6364(3)  | 5760(3)  | 34(1) |
| O(5')  | 8220(3)  | 9776(3)  | 7073(3)  | 32(1) |
| O(6')  | 9556(3)  | 11522(3) | 6795(3)  | 40(1) |
| O(7')  | 8592(3)  | 13335(3) | 1740(3)  | 36(1) |
| O(8')  | 7010(3)  | 5833(3)  | 4291(3)  | 36(1) |
| O(9')  | 5030(3)  | 5842(3)  | 3279(3)  | 38(1) |
| C(1')  | 8459(6)  | 9000(5)  | 10517(5) | 48(1) |
| C(2')  | 8181(5)  | 7691(4)  | 11355(5) | 34(1) |
| C(3')  | 7862(4)  | 6809(4)  | 11024(4) | 32(1) |
| C(4')  | 7720(4)  | 6894(4)  | 9732(4)  | 32(1) |
| C(5')  | 6155(4)  | 7012(4)  | 9321(4)  | 33(1) |
| C(6')  | 6009(4)  | 7210(4)  | 7974(4)  | 27(1) |
| C(7')  | 5316(4)  | 6582(4)  | 7505(4)  | 30(1) |
| C(8')  | 5189(4)  | 6918(4)  | 6188(4)  | 31(1) |
| C(9')  | 5909(4)  | 7953(4)  | 5407(4)  | 28(1) |
| C(10') | 6612(4)  | 8545(4)  | 5979(4)  | 27(1) |
| C(11') | 7365(4)  | 9554(4)  | 5299(4)  | 28(1) |
| C(12') | 8137(4)  | 10172(4) | 5844(4)  | 29(1) |
| C(13') | 8764(4)  | 11209(4) | 5082(5)  | 29(1) |
| C(14') | 9456(4)  | 11876(4) | 5656(5)  | 31(1) |
| C(15') | 10047(4) | 13039(4) | 4824(5)  | 37(1) |
| C(16') | 9299(5)  | 13705(4) | 3524(4)  | 35(1) |
| C(17') | 9335(4)  | 12750(4) | 2957(4)  | 31(1) |
| C(18') | 8679(4)  | 11621(4) | 3770(4)  | 30(1) |
| C(19') | 8006(5)  | 10979(4) | 3255(4)  | 33(1) |
| C(20') | 7340(4)  | 9955(4)  | 3997(4)  | 29(1) |
| C(21') | 6599(4)  | 9355(4)  | 3431(5)  | 31(1) |
| C(22') | 5916(4)  | 8380(4)  | 4089(4)  | 30(1) |
| C(23') | 5196(4)  | 7780(4)  | 3401(4)  | 31(1) |
| C(24') | 5858(5)  | 6381(4)  | 3729(4)  | 31(1) |

|        |          |           |           |       |
|--------|----------|-----------|-----------|-------|
| C(25') | 5181(5)  | 8119(4)   | 9491(4)   | 35(1) |
| O(2S)  | 6938(3)  | 13273(3)  | -115(3)   | 50(1) |
| C(2S)  | 7785(6)  | 13331(6)  | -1134(6)  | 62(2) |
| C(4S)  | 8130(30) | 13590(30) | -2480(30) | 62(2) |
| O(1S)  | 2532(3)  | -3496(3)  | 9875(3)   | 48(1) |
| C(1S)  | 2174(6)  | -3475(6)  | 11081(6)  | 65(2) |
| C(3S)  | 1980(30) | -4030(30) | 12370(30) | 65(2) |

---

Table 3. Bond lengths [ $\text{\AA}$ ] and angles [ $^\circ$ ] for SHELLMYCINA.

---

|             |          |              |          |
|-------------|----------|--------------|----------|
| O(1)-H(1)   | 0.8400   | C(11)-C(12)  | 1.423(7) |
| O(1)-C(4)   | 1.430(5) | C(11)-C(20)  | 1.414(7) |
| O(2)-H(2)   | 0.8400   | C(12)-C(13)  | 1.415(6) |
| O(2)-C(5)   | 1.418(5) | C(13)-C(14)  | 1.474(7) |
| O(3)-C(6)   | 1.367(5) | C(13)-C(18)  | 1.414(7) |
| O(3)-C(10)  | 1.357(6) | C(14)-C(15)  | 1.490(6) |
| O(4)-C(8)   | 1.251(5) | C(15)-H(15A) | 0.9900   |
| O(5)-H(5)   | 0.8400   | C(15)-H(15B) | 0.9900   |
| O(5)-C(12)  | 1.330(6) | C(15)-C(16)  | 1.526(7) |
| O(6)-C(14)  | 1.237(6) | C(16)-H(16A) | 0.9900   |
| O(7)-H(7)   | 0.8400   | C(16)-H(16B) | 0.9900   |
| O(7)-C(17)  | 1.426(6) | C(16)-C(17)  | 1.496(7) |
| O(8)-C(24)  | 1.207(5) | C(17)-H(17)  | 1.0000   |
| O(9)-H(9)   | 0.8400   | C(17)-C(18)  | 1.536(6) |
| O(9)-C(24)  | 1.330(5) | C(18)-C(19)  | 1.367(6) |
| C(1)-H(1A)  | 0.9800   | C(19)-H(19)  | 0.9500   |
| C(1)-H(1B)  | 0.9800   | C(19)-C(20)  | 1.410(6) |
| C(1)-H(1C)  | 0.9800   | C(20)-C(21)  | 1.432(6) |
| C(1)-C(2)   | 1.481(7) | C(21)-H(21)  | 0.9500   |
| C(2)-H(2A)  | 0.9500   | C(21)-C(22)  | 1.364(6) |
| C(2)-C(3)   | 1.326(6) | C(22)-C(23)  | 1.507(6) |
| C(3)-H(3)   | 0.9500   | C(23)-H(23A) | 0.9900   |
| C(3)-C(4)   | 1.487(6) | C(23)-H(23B) | 0.9900   |
| C(4)-H(4)   | 1.0000   | C(23)-C(24)  | 1.516(6) |
| C(4)-C(5)   | 1.542(6) | C(25)-H(25A) | 0.9800   |
| C(5)-C(6)   | 1.514(6) | C(25)-H(25B) | 0.9800   |
| C(5)-C(25)  | 1.524(6) | C(25)-H(25C) | 0.9800   |
| C(6)-C(7)   | 1.327(6) | O(1')-H(1')  | 0.8400   |
| C(7)-H(7A)  | 0.9500   | O(1')-C(4')  | 1.443(5) |
| C(7)-C(8)   | 1.439(7) | O(2')-H(2')  | 0.8400   |
| C(8)-C(9)   | 1.472(6) | O(2')-C(5')  | 1.429(5) |
| C(9)-C(10)  | 1.394(7) | O(3')-C(6')  | 1.367(5) |
| C(9)-C(22)  | 1.426(7) | O(3')-C(10') | 1.359(5) |
| C(10)-C(11) | 1.442(6) | O(4')-C(8')  | 1.238(5) |

|               |          |               |          |
|---------------|----------|---------------|----------|
| O(5')-H(5')   | 0.8400   | C(16')-H(16C) | 0.9900   |
| O(5')-C(12')  | 1.331(6) | C(16')-H(16D) | 0.9900   |
| O(6')-C(14')  | 1.236(6) | C(16')-C(17') | 1.506(7) |
| O(7')-H(7')   | 0.8400   | C(17')-H(17') | 1.0000   |
| O(7')-C(17')  | 1.437(5) | C(17')-C(18') | 1.513(6) |
| O(8')-C(24')  | 1.207(5) | C(18')-C(19') | 1.377(7) |
| O(9')-H(9')   | 0.8400   | C(19')-H(19') | 0.9500   |
| O(9')-C(24')  | 1.328(5) | C(19')-C(20') | 1.414(6) |
| C(1')-H(1'A)  | 0.9800   | C(20')-C(21') | 1.417(6) |
| C(1')-H(1'B)  | 0.9800   | C(21')-H(21') | 0.9500   |
| C(1')-H(1'C)  | 0.9800   | C(21')-C(22') | 1.361(6) |
| C(1')-C(2')   | 1.501(7) | C(22')-C(23') | 1.507(6) |
| C(2')-H(2'A)  | 0.9500   | C(23')-H(23C) | 0.9900   |
| C(2')-C(3')   | 1.317(6) | C(23')-H(23D) | 0.9900   |
| C(3')-H(3')   | 0.9500   | C(23')-C(24') | 1.505(6) |
| C(3')-C(4')   | 1.497(6) | C(25')-H(25D) | 0.9800   |
| C(4')-H(4')   | 1.0000   | C(25')-H(25E) | 0.9800   |
| C(4')-C(5')   | 1.542(6) | C(25')-H(25F) | 0.9800   |
| C(5')-C(6')   | 1.518(7) | O(2S)-H(2S)   | 0.8400   |
| C(5')-C(25')  | 1.519(6) | O(2S)-C(2S)   | 1.436(7) |
| C(6')-C(7')   | 1.339(6) | C(2S)-H(2SA)  | 0.9800   |
| C(7')-H(7'A)  | 0.9500   | C(2S)-H(2SB)  | 0.9800   |
| C(7')-C(8')   | 1.443(7) | C(2S)-H(2SC)  | 0.9800   |
| C(8')-C(9')   | 1.467(6) | C(2S)-H(2SD)  | 0.9900   |
| C(9')-C(10')  | 1.393(6) | C(2S)-H(2SE)  | 0.9900   |
| C(9')-C(22')  | 1.430(7) | C(2S)-C(4S)   | 1.54(3)  |
| C(10')-C(11') | 1.436(6) | C(4S)-H(4SA)  | 0.9800   |
| C(11')-C(12') | 1.434(7) | C(4S)-H(4SB)  | 0.9800   |
| C(11')-C(20') | 1.414(7) | C(4S)-H(4SC)  | 0.9800   |
| C(12')-C(13') | 1.408(6) | O(1S)-H(1S)   | 0.8400   |
| C(13')-C(14') | 1.458(7) | O(1S)-C(1S)   | 1.475(8) |
| C(13')-C(18') | 1.423(7) | C(1S)-H(1SA)  | 0.9800   |
| C(14')-C(15') | 1.512(6) | C(1S)-H(1SB)  | 0.9800   |
| C(15')-H(15C) | 0.9900   | C(1S)-H(1SC)  | 0.9800   |
| C(15')-H(15D) | 0.9900   | C(1S)-H(1SD)  | 0.9900   |
| C(15')-C(16') | 1.517(6) | C(1S)-H(1SE)  | 0.9900   |

|                  |          |                     |          |
|------------------|----------|---------------------|----------|
| C(1S)-C(3S)      | 1.42(3)  | C(7)-C(6)-O(3)      | 122.5(4) |
| C(3S)-H(3SA)     | 0.9800   | C(7)-C(6)-C(5)      | 127.8(4) |
| C(3S)-H(3SB)     | 0.9800   | C(6)-C(7)-H(7A)     | 119.4    |
| C(3S)-H(3SC)     | 0.9800   | C(6)-C(7)-C(8)      | 121.2(4) |
|                  |          | C(8)-C(7)-H(7A)     | 119.4    |
| C(4)-O(1)-H(1)   | 109.5    | O(4)-C(8)-C(7)      | 122.0(4) |
| C(5)-O(2)-H(2)   | 109.5    | O(4)-C(8)-C(9)      | 122.0(4) |
| C(10)-O(3)-C(6)  | 120.2(4) | C(7)-C(8)-C(9)      | 116.0(4) |
| C(12)-O(5)-H(5)  | 109.5    | C(10)-C(9)-C(8)     | 118.2(4) |
| C(17)-O(7)-H(7)  | 109.5    | C(10)-C(9)-C(22)    | 118.5(4) |
| C(24)-O(9)-H(9)  | 109.5    | C(22)-C(9)-C(8)     | 123.3(4) |
| H(1A)-C(1)-H(1B) | 109.5    | O(3)-C(10)-C(9)     | 121.8(4) |
| H(1A)-C(1)-H(1C) | 109.5    | O(3)-C(10)-C(11)    | 115.3(4) |
| H(1B)-C(1)-H(1C) | 109.5    | C(9)-C(10)-C(11)    | 122.9(5) |
| C(2)-C(1)-H(1A)  | 109.5    | C(12)-C(11)-C(10)   | 124.7(5) |
| C(2)-C(1)-H(1B)  | 109.5    | C(20)-C(11)-C(10)   | 117.1(4) |
| C(2)-C(1)-H(1C)  | 109.5    | C(20)-C(11)-C(12)   | 118.1(4) |
| C(1)-C(2)-H(2A)  | 116.3    | O(5)-C(12)-C(11)    | 119.9(4) |
| C(3)-C(2)-C(1)   | 127.4(5) | O(5)-C(12)-C(13)    | 120.4(4) |
| C(3)-C(2)-H(2A)  | 116.3    | C(13)-C(12)-C(11)   | 119.6(5) |
| C(2)-C(3)-H(3)   | 116.6    | C(12)-C(13)-C(14)   | 118.5(5) |
| C(2)-C(3)-C(4)   | 126.8(4) | C(18)-C(13)-C(12)   | 120.5(4) |
| C(4)-C(3)-H(3)   | 116.6    | C(18)-C(13)-C(14)   | 121.0(4) |
| O(1)-C(4)-C(3)   | 113.1(4) | O(6)-C(14)-C(13)    | 121.3(4) |
| O(1)-C(4)-H(4)   | 107.5    | O(6)-C(14)-C(15)    | 120.0(5) |
| O(1)-C(4)-C(5)   | 111.1(3) | C(13)-C(14)-C(15)   | 118.6(5) |
| C(3)-C(4)-H(4)   | 107.5    | C(14)-C(15)-H(15A)  | 109.0    |
| C(3)-C(4)-C(5)   | 109.9(3) | C(14)-C(15)-H(15B)  | 109.0    |
| C(5)-C(4)-H(4)   | 107.5    | C(14)-C(15)-C(16)   | 112.9(4) |
| O(2)-C(5)-C(4)   | 111.2(3) | H(15A)-C(15)-H(15B) | 107.8    |
| O(2)-C(5)-C(6)   | 109.3(3) | C(16)-C(15)-H(15A)  | 109.0    |
| O(2)-C(5)-C(25)  | 106.9(3) | C(16)-C(15)-H(15B)  | 109.0    |
| C(6)-C(5)-C(4)   | 110.6(3) | C(15)-C(16)-H(16A)  | 109.2    |
| C(6)-C(5)-C(25)  | 107.9(4) | C(15)-C(16)-H(16B)  | 109.2    |
| C(25)-C(5)-C(4)  | 110.8(3) | H(16A)-C(16)-H(16B) | 107.9    |
| O(3)-C(6)-C(5)   | 109.6(3) | C(17)-C(16)-C(15)   | 112.1(4) |

|                     |          |                     |          |
|---------------------|----------|---------------------|----------|
| C(17)-C(16)-H(16A)  | 109.2    | H(25A)-C(25)-H(25C) | 109.5    |
| C(17)-C(16)-H(16B)  | 109.2    | H(25B)-C(25)-H(25C) | 109.5    |
| O(7)-C(17)-C(16)    | 108.4(3) | C(4')-O(1')-H(1')   | 109.5    |
| O(7)-C(17)-H(17)    | 108.3    | C(5')-O(2')-H(2')   | 109.5    |
| O(7)-C(17)-C(18)    | 111.8(4) | C(10')-O(3')-C(6')  | 120.7(3) |
| C(16)-C(17)-H(17)   | 108.3    | C(12')-O(5')-H(5')  | 109.5    |
| C(16)-C(17)-C(18)   | 111.6(4) | C(17')-O(7')-H(7')  | 109.5    |
| C(18)-C(17)-H(17)   | 108.3    | C(24')-O(9')-H(9')  | 109.5    |
| C(13)-C(18)-C(17)   | 120.0(4) | H(1'A)-C(1')-H(1'B) | 109.5    |
| C(19)-C(18)-C(13)   | 119.7(4) | H(1'A)-C(1')-H(1'C) | 109.5    |
| C(19)-C(18)-C(17)   | 120.2(4) | H(1'B)-C(1')-H(1'C) | 109.5    |
| C(18)-C(19)-H(19)   | 119.6    | C(2')-C(1')-H(1'A)  | 109.5    |
| C(18)-C(19)-C(20)   | 120.7(4) | C(2')-C(1')-H(1'B)  | 109.5    |
| C(20)-C(19)-H(19)   | 119.6    | C(2')-C(1')-H(1'C)  | 109.5    |
| C(11)-C(20)-C(21)   | 118.8(4) | C(1')-C(2')-H(2'A)  | 116.4    |
| C(19)-C(20)-C(11)   | 120.9(4) | C(3')-C(2')-C(1')   | 127.3(5) |
| C(19)-C(20)-C(21)   | 120.2(5) | C(3')-C(2')-H(2'A)  | 116.4    |
| C(20)-C(21)-H(21)   | 118.5    | C(2')-C(3')-H(3')   | 116.4    |
| C(22)-C(21)-C(20)   | 123.0(5) | C(2')-C(3')-C(4')   | 127.2(4) |
| C(22)-C(21)-H(21)   | 118.5    | C(4')-C(3')-H(3')   | 116.4    |
| C(9)-C(22)-C(23)    | 121.9(4) | O(1')-C(4')-C(3')   | 108.9(3) |
| C(21)-C(22)-C(9)    | 119.4(4) | O(1')-C(4')-H(4')   | 109.6    |
| C(21)-C(22)-C(23)   | 118.7(4) | O(1')-C(4')-C(5')   | 107.9(3) |
| C(22)-C(23)-H(23A)  | 109.1    | C(3')-C(4')-H(4')   | 109.6    |
| C(22)-C(23)-H(23B)  | 109.1    | C(3')-C(4')-C(5')   | 111.2(3) |
| C(22)-C(23)-C(24)   | 112.7(4) | C(5')-C(4')-H(4')   | 109.6    |
| H(23A)-C(23)-H(23B) | 107.8    | O(2')-C(5')-C(4')   | 110.0(3) |
| C(24)-C(23)-H(23A)  | 109.1    | O(2')-C(5')-C(6')   | 107.7(3) |
| C(24)-C(23)-H(23B)  | 109.1    | O(2')-C(5')-C(25')  | 107.3(3) |
| O(8)-C(24)-O(9)     | 123.8(4) | C(6')-C(5')-C(4')   | 110.7(3) |
| O(8)-C(24)-C(23)    | 124.9(4) | C(6')-C(5')-C(25')  | 110.0(3) |
| O(9)-C(24)-C(23)    | 111.2(4) | C(25')-C(5')-C(4')  | 111.1(4) |
| C(5)-C(25)-H(25A)   | 109.5    | O(3')-C(6')-C(5')   | 111.1(4) |
| C(5)-C(25)-H(25B)   | 109.5    | C(7')-C(6')-O(3')   | 121.4(4) |
| C(5)-C(25)-H(25C)   | 109.5    | C(7')-C(6')-C(5')   | 127.4(4) |
| H(25A)-C(25)-H(25B) | 109.5    | C(6')-C(7')-H(7'A)  | 119.1    |

|                      |          |                      |          |
|----------------------|----------|----------------------|----------|
| C(6')-C(7')-C(8')    | 121.7(4) | O(7')-C(17')-H(17')  | 108.3    |
| C(8')-C(7')-H(7'A)   | 119.1    | O(7')-C(17')-C(18')  | 108.3(3) |
| O(4')-C(8')-C(7')    | 121.2(4) | C(16')-C(17')-H(17') | 108.3    |
| O(4')-C(8')-C(9')    | 122.9(4) | C(16')-C(17')-C(18') | 111.1(4) |
| C(7')-C(8')-C(9')    | 115.9(4) | C(18')-C(17')-H(17') | 108.3    |
| C(10')-C(9')-C(8')   | 118.3(4) | C(13')-C(18')-C(17') | 119.9(4) |
| C(10')-C(9')-C(22')  | 118.8(4) | C(19')-C(18')-C(13') | 119.4(4) |
| C(22')-C(9')-C(8')   | 122.9(4) | C(19')-C(18')-C(17') | 120.7(4) |
| O(3')-C(10')-C(9')   | 121.9(3) | C(18')-C(19')-H(19') | 119.3    |
| O(3')-C(10')-C(11')  | 115.5(4) | C(18')-C(19')-C(20') | 121.3(5) |
| C(9')-C(10')-C(11')  | 122.6(4) | C(20')-C(19')-H(19') | 119.3    |
| C(12')-C(11')-C(10') | 124.9(4) | C(11')-C(20')-C(19') | 120.5(4) |
| C(20')-C(11')-C(10') | 117.0(4) | C(11')-C(20')-C(21') | 119.5(4) |
| C(20')-C(11')-C(12') | 118.1(4) | C(19')-C(20')-C(21') | 119.9(4) |
| O(5')-C(12')-C(11')  | 119.1(4) | C(20')-C(21')-H(21') | 118.5    |
| O(5')-C(12')-C(13')  | 120.6(4) | C(22')-C(21')-C(20') | 122.9(5) |
| C(13')-C(12')-C(11') | 120.3(5) | C(22')-C(21')-H(21') | 118.5    |
| C(12')-C(13')-C(14') | 118.9(5) | C(9')-C(22')-C(23')  | 122.1(4) |
| C(12')-C(13')-C(18') | 120.3(4) | C(21')-C(22')-C(9')  | 119.2(4) |
| C(18')-C(13')-C(14') | 120.8(4) | C(21')-C(22')-C(23') | 118.7(4) |
| O(6')-C(14')-C(13')  | 121.7(4) | C(22')-C(23')-H(23C) | 108.7    |
| O(6')-C(14')-C(15')  | 119.7(4) | C(22')-C(23')-H(23D) | 108.7    |
| C(13')-C(14')-C(15') | 118.6(4) | H(23C)-C(23')-H(23D) | 107.6    |
| C(14')-C(15')-H(15C) | 109.1    | C(24')-C(23')-C(22') | 114.0(4) |
| C(14')-C(15')-H(15D) | 109.1    | C(24')-C(23')-H(23C) | 108.7    |
| C(14')-C(15')-C(16') | 112.5(4) | C(24')-C(23')-H(23D) | 108.7    |
| H(15C)-C(15')-H(15D) | 107.8    | O(8')-C(24')-O(9')   | 124.4(4) |
| C(16')-C(15')-H(15C) | 109.1    | O(8')-C(24')-C(23')  | 124.5(4) |
| C(16')-C(15')-H(15D) | 109.1    | O(9')-C(24')-C(23')  | 111.1(3) |
| C(15')-C(16')-H(16C) | 109.5    | C(5')-C(25')-H(25D)  | 109.5    |
| C(15')-C(16')-H(16D) | 109.5    | C(5')-C(25')-H(25E)  | 109.5    |
| H(16C)-C(16')-H(16D) | 108.1    | C(5')-C(25')-H(25F)  | 109.5    |
| C(17')-C(16')-C(15') | 110.6(3) | H(25D)-C(25')-H(25E) | 109.5    |
| C(17')-C(16')-H(16C) | 109.5    | H(25D)-C(25')-H(25F) | 109.5    |
| C(17')-C(16')-H(16D) | 109.5    | H(25E)-C(25')-H(25F) | 109.5    |
| O(7')-C(17')-C(16')  | 112.3(3) | C(2S)-O(2S)-H(2S)    | 109.5    |



|                     |           |                     |       |
|---------------------|-----------|---------------------|-------|
| O(2S)-C(2S)-H(2SA)  | 109.5     | H(3SB)-C(3S)-H(3SC) | 109.5 |
| O(2S)-C(2S)-H(2SB)  | 109.5     |                     |       |
| O(2S)-C(2S)-H(2SC)  | 109.5     |                     |       |
| O(2S)-C(2S)-H(2SD)  | 96.7      |                     |       |
| O(2S)-C(2S)-H(2SE)  | 96.7      |                     |       |
| O(2S)-C(2S)-C(4S)   | 158.4(12) |                     |       |
| H(2SA)-C(2S)-H(2SB) | 109.5     |                     |       |
| H(2SA)-C(2S)-H(2SC) | 109.5     |                     |       |
| H(2SB)-C(2S)-H(2SC) | 109.5     |                     |       |
| H(2SD)-C(2S)-H(2SE) | 103.5     |                     |       |
| C(4S)-C(2S)-H(2SD)  | 96.7      |                     |       |
| C(4S)-C(2S)-H(2SE)  | 96.7      |                     |       |
| C(2S)-C(4S)-H(4SA)  | 109.5     |                     |       |
| C(2S)-C(4S)-H(4SB)  | 109.5     |                     |       |
| C(2S)-C(4S)-H(4SC)  | 109.5     |                     |       |
| H(4SA)-C(4S)-H(4SB) | 109.5     |                     |       |
| H(4SA)-C(4S)-H(4SC) | 109.5     |                     |       |
| H(4SB)-C(4S)-H(4SC) | 109.5     |                     |       |
| C(1S)-O(1S)-H(1S)   | 109.5     |                     |       |
| O(1S)-C(1S)-H(1SA)  | 109.5     |                     |       |
| O(1S)-C(1S)-H(1SB)  | 109.5     |                     |       |
| O(1S)-C(1S)-H(1SC)  | 109.5     |                     |       |
| O(1S)-C(1S)-H(1SD)  | 97.5      |                     |       |
| O(1S)-C(1S)-H(1SE)  | 97.5      |                     |       |
| H(1SA)-C(1S)-H(1SB) | 109.5     |                     |       |
| H(1SA)-C(1S)-H(1SC) | 109.5     |                     |       |
| H(1SB)-C(1S)-H(1SC) | 109.5     |                     |       |
| H(1SD)-C(1S)-H(1SE) | 103.6     |                     |       |
| C(3S)-C(1S)-O(1S)   | 155.5(14) |                     |       |
| C(3S)-C(1S)-H(1SD)  | 97.5      |                     |       |
| C(3S)-C(1S)-H(1SE)  | 97.5      |                     |       |
| C(1S)-C(3S)-H(3SA)  | 109.5     |                     |       |
| C(1S)-C(3S)-H(3SB)  | 109.5     |                     |       |
| C(1S)-C(3S)-H(3SC)  | 109.5     |                     |       |
| H(3SA)-C(3S)-H(3SB) | 109.5     |                     |       |
| H(3SA)-C(3S)-H(3SC) | 109.5     |                     |       |

---

Table 4. Anisotropic displacement parameters ( $\text{\AA}^2 \times 10^3$ ) for SHELLMYCINA. The anisotropic displacement factor exponent takes the form:  $-2\pi^2 [ h^2 a^{*2} U^{11} + \dots + 2 h k a^* b^* U^{12} ]$

|       | U <sup>11</sup> | U <sup>22</sup> | U <sup>33</sup> | U <sup>23</sup> | U <sup>13</sup> | U <sup>12</sup> |
|-------|-----------------|-----------------|-----------------|-----------------|-----------------|-----------------|
| O(1)  | 40(2)           | 43(2)           | 45(2)           | -19(2)          | 5(2)            | -6(1)           |
| O(2)  | 35(2)           | 37(2)           | 32(2)           | -9(1)           | 5(1)            | -13(1)          |
| O(3)  | 32(2)           | 34(2)           | 24(2)           | -11(1)          | 5(1)            | -10(1)          |
| O(4)  | 30(2)           | 36(2)           | 36(2)           | -18(1)          | 4(1)            | -11(1)          |
| O(5)  | 38(2)           | 41(2)           | 31(2)           | -17(2)          | 2(1)            | -13(1)          |
| O(6)  | 49(2)           | 46(2)           | 39(3)           | -16(2)          | -3(2)           | -17(1)          |
| O(7)  | 38(2)           | 38(2)           | 40(2)           | -12(2)          | 7(2)            | -10(1)          |
| O(8)  | 32(2)           | 39(2)           | 43(2)           | -19(1)          | 2(2)            | -6(1)           |
| O(9)  | 39(2)           | 35(2)           | 44(2)           | -20(2)          | -1(2)           | -10(1)          |
| C(1)  | 45(3)           | 61(3)           | 44(4)           | -24(3)          | 4(2)            | -20(2)          |
| C(2)  | 44(3)           | 45(2)           | 32(3)           | -19(2)          | 2(2)            | -3(2)           |
| C(3)  | 46(3)           | 39(2)           | 34(3)           | -19(2)          | 9(2)            | -13(2)          |
| C(4)  | 32(2)           | 36(2)           | 35(3)           | -15(2)          | 6(2)            | -10(2)          |
| C(5)  | 32(2)           | 34(2)           | 25(3)           | -11(2)          | 2(2)            | -12(2)          |
| C(6)  | 29(2)           | 29(2)           | 32(3)           | -11(2)          | 7(2)            | -9(2)           |
| C(7)  | 29(2)           | 35(2)           | 31(3)           | -12(2)          | 5(2)            | -9(2)           |
| C(8)  | 26(2)           | 31(2)           | 29(3)           | -13(2)          | 4(2)            | -4(2)           |
| C(9)  | 29(2)           | 29(2)           | 33(3)           | -11(2)          | 2(2)            | -2(2)           |
| C(10) | 26(2)           | 31(2)           | 31(3)           | -14(2)          | 0(2)            | 2(2)            |
| C(11) | 24(2)           | 28(2)           | 35(3)           | -11(2)          | 3(2)            | -4(2)           |
| C(12) | 25(2)           | 35(2)           | 33(3)           | -14(2)          | 1(2)            | -1(2)           |
| C(13) | 27(2)           | 28(2)           | 35(3)           | -12(2)          | 3(2)            | -6(2)           |
| C(14) | 29(2)           | 34(2)           | 45(4)           | -13(2)          | -2(2)           | -3(2)           |
| C(15) | 40(2)           | 30(2)           | 44(3)           | -10(2)          | 2(2)            | -7(2)           |
| C(16) | 33(2)           | 29(2)           | 47(3)           | -9(2)           | 2(2)            | -9(2)           |
| C(17) | 28(2)           | 31(2)           | 40(3)           | -9(2)           | 8(2)            | -4(2)           |
| C(18) | 24(2)           | 31(2)           | 36(3)           | -11(2)          | 4(2)            | -3(2)           |
| C(19) | 26(2)           | 29(2)           | 31(3)           | -11(2)          | 5(2)            | -5(2)           |
| C(20) | 27(2)           | 29(2)           | 29(3)           | -10(2)          | -1(2)           | -1(2)           |
| C(21) | 29(2)           | 31(2)           | 29(3)           | -9(2)           | -1(2)           | -2(2)           |
| C(22) | 26(2)           | 31(2)           | 32(3)           | -17(2)          | 2(2)            | -4(2)           |

|        |       |       |       |        |      |        |
|--------|-------|-------|-------|--------|------|--------|
| C(23)  | 34(2) | 34(2) | 30(3) | -11(2) | 4(2) | -7(2)  |
| C(24)  | 35(3) | 38(2) | 27(3) | -18(2) | 9(2) | -13(2) |
| C(25)  | 36(2) | 36(2) | 30(3) | -10(2) | 3(2) | -10(2) |
| O(1')  | 28(1) | 33(1) | 33(2) | -12(1) | 6(1) | -7(1)  |
| O(2')  | 32(2) | 29(1) | 32(2) | -10(1) | 4(1) | -8(1)  |
| O(3')  | 28(1) | 31(1) | 29(2) | -12(1) | 4(1) | -9(1)  |
| O(4')  | 33(2) | 39(2) | 34(2) | -18(1) | 5(1) | -11(1) |
| O(5')  | 38(2) | 34(2) | 28(2) | -14(1) | 2(1) | -15(1) |
| O(6')  | 49(2) | 42(2) | 30(2) | -13(2) | 2(2) | -19(1) |
| O(7')  | 37(2) | 33(2) | 32(2) | -7(1)  | 4(1) | -10(1) |
| O(8')  | 34(2) | 36(2) | 41(2) | -20(1) | 1(2) | -6(1)  |
| O(9')  | 42(2) | 36(1) | 42(2) | -20(1) | 0(1) | -12(1) |
| C(1')  | 60(3) | 54(3) | 40(3) | -25(2) | 9(2) | -23(2) |
| C(2')  | 33(2) | 44(2) | 27(2) | -16(2) | 0(2) | -9(2)  |
| C(3')  | 28(2) | 38(2) | 26(2) | -9(2)  | 3(2) | -7(2)  |
| C(4')  | 35(2) | 30(2) | 31(2) | -12(2) | 5(2) | -8(2)  |
| C(5')  | 31(2) | 28(2) | 37(3) | -8(2)  | 4(2) | -9(2)  |
| C(6')  | 26(2) | 26(2) | 28(3) | -8(2)  | 4(2) | -6(2)  |
| C(7')  | 26(2) | 31(2) | 30(3) | -10(2) | 3(2) | -7(2)  |
| C(8')  | 25(2) | 31(2) | 37(3) | -15(2) | 4(2) | -5(2)  |
| C(9')  | 24(2) | 28(2) | 30(3) | -11(2) | 1(2) | 1(2)   |
| C(10') | 23(2) | 31(2) | 28(3) | -13(2) | 5(2) | -6(2)  |
| C(11') | 26(2) | 28(2) | 29(3) | -13(2) | 2(2) | -1(2)  |
| C(12') | 29(2) | 29(2) | 27(3) | -11(2) | 2(2) | -4(2)  |
| C(13') | 23(2) | 31(2) | 35(3) | -15(2) | 2(2) | -4(2)  |
| C(14') | 28(2) | 34(2) | 32(3) | -15(2) | 2(2) | -6(2)  |
| C(15') | 36(2) | 33(2) | 43(3) | -16(2) | 2(2) | -10(2) |
| C(16') | 32(2) | 30(2) | 38(3) | -9(2)  | 4(2) | -8(2)  |
| C(17') | 30(2) | 32(2) | 29(3) | -10(2) | 4(2) | -7(2)  |
| C(18') | 28(2) | 31(2) | 31(3) | -13(2) | 7(2) | -5(2)  |
| C(19') | 33(2) | 33(2) | 28(3) | -11(2) | 4(2) | -2(2)  |
| C(20') | 26(2) | 29(2) | 30(3) | -13(2) | 5(2) | -2(2)  |
| C(21') | 31(2) | 36(2) | 26(3) | -15(2) | 2(2) | -3(2)  |
| C(22') | 25(2) | 30(2) | 34(3) | -14(2) | 3(2) | 0(2)   |
| C(23') | 30(2) | 37(2) | 30(3) | -17(2) | 2(2) | -12(2) |
| C(24') | 33(2) | 33(2) | 29(3) | -12(2) | 7(2) | -11(2) |

|        |       |       |       |        |       |        |
|--------|-------|-------|-------|--------|-------|--------|
| C(25') | 33(2) | 33(2) | 35(3) | -12(2) | 5(2)  | -3(2)  |
| O(2S)  | 40(2) | 62(2) | 43(2) | -19(2) | 2(2)  | -11(2) |
| C(2S)  | 49(3) | 74(4) | 73(4) | -41(3) | 9(3)  | -10(3) |
| C(4S)  | 49(3) | 74(4) | 73(4) | -41(3) | 9(3)  | -10(3) |
| O(1S)  | 37(2) | 48(2) | 58(2) | -21(2) | 9(2)  | -9(1)  |
| C(1S)  | 54(3) | 67(3) | 68(3) | -24(3) | 13(3) | -8(3)  |
| C(3S)  | 54(3) | 67(3) | 68(3) | -24(3) | 13(3) | -8(3)  |

---

Table 5. Hydrogen coordinates ( $\times 10^4$ ) and isotropic displacement parameters ( $\text{\AA}^2 \times 10^{-3}$ ) for SHELLMYCINA.

|        | x    | y     | z     | U(eq) |
|--------|------|-------|-------|-------|
| H(1)   | 5593 | 1743  | -49   | 64    |
| H(2)   | 4845 | 3679  | -142  | 54    |
| H(5)   | 1396 | -679  | 2685  | 53    |
| H(7)   | 1272 | -3426 | 8648  | 60    |
| H(9)   | 4841 | 4609  | 6214  | 57    |
| H(1A)  | 1978 | 85    | 271   | 72    |
| H(1B)  | 1614 | -195  | -898  | 72    |
| H(1C)  | 489  | 794   | -548  | 72    |
| H(2A)  | 1899 | 1894  | -2252 | 48    |
| H(3)   | 3404 | 2787  | -1691 | 46    |
| H(4)   | 3161 | 1070  | 823   | 41    |
| H(7A)  | 4959 | 3819  | 1778  | 38    |
| H(15A) | 1179 | -4368 | 5287  | 48    |
| H(15B) | -451 | -3781 | 4744  | 48    |
| H(16A) | -950 | -3053 | 6298  | 46    |
| H(16B) | -200 | -4558 | 6957  | 46    |
| H(17)  | 1951 | -4070 | 7262  | 42    |
| H(19)  | 2075 | -1608 | 7547  | 35    |
| H(21)  | 3414 | 62    | 7330  | 38    |
| H(23A) | 5915 | 1762  | 6245  | 41    |
| H(23B) | 4903 | 1337  | 7362  | 41    |
| H(25A) | 1469 | 4177  | 637   | 53    |
| H(25B) | 1183 | 2793  | 817   | 53    |
| H(25C) | 1385 | 3838  | -539  | 53    |
| H(1')  | 9196 | 5910  | 9226  | 48    |
| H(2')  | 6216 | 5213  | 10005 | 48    |
| H(5')  | 8681 | 10227 | 7266  | 48    |
| H(7')  | 8910 | 13992 | 1289  | 54    |
| H(9')  | 5358 | 5039  | 3558  | 57    |
| H(1'A) | 7606 | 9668  | 10410 | 72    |
| H(1'B) | 8689 | 9012  | 9705  | 72    |

|        |       |       |       |    |
|--------|-------|-------|-------|----|
| H(1'C) | 9262  | 9173  | 10888 | 72 |
| H(2'A) | 8241  | 7475  | 12222 | 41 |
| H(3')  | 7705  | 6033  | 11677 | 38 |
| H(4')  | 8085  | 7662  | 9142  | 38 |
| H(7'A) | 4898  | 5897  | 8054  | 36 |
| H(15C) | 11077 | 12755 | 4770  | 44 |
| H(15D) | 9944  | 13669 | 5202  | 44 |
| H(16C) | 8295  | 14095 | 3561  | 42 |
| H(16D) | 9774  | 14411 | 2997  | 42 |
| H(17') | 10354 | 12405 | 2883  | 38 |
| H(19') | 7989  | 11229 | 2383  | 39 |
| H(21') | 6579  | 9645  | 2554  | 37 |
| H(23C) | 4181  | 7844  | 3582  | 37 |
| H(23D) | 5226  | 8287  | 2497  | 37 |
| H(25D) | 4195  | 8173  | 9223  | 53 |
| H(25E) | 5475  | 8937  | 8990  | 53 |
| H(25F) | 5244  | 7961  | 10370 | 53 |
| H(2S)  | 7460  | 13214 | 482   | 75 |
| H(2SA) | 7222  | 13233 | -1765 | 93 |
| H(2SB) | 8635  | 12631 | -831  | 93 |
| H(2SC) | 8077  | 14170 | -1500 | 93 |
| H(2SD) | 8326  | 12423 | -739  | 74 |
| H(2SE) | 8447  | 13831 | -995  | 74 |
| H(4SA) | 7970  | 12863 | -2658 | 93 |
| H(4SB) | 9128  | 13665 | -2578 | 93 |
| H(4SC) | 7507  | 14393 | -3059 | 93 |
| H(1S)  | 3406  | -3808 | 9912  | 72 |
| H(1SA) | 2931  | -3201 | 11403 | 98 |
| H(1SB) | 2087  | -4346 | 11672 | 98 |
| H(1SC) | 1268  | -2865 | 10968 | 98 |
| H(1SD) | 2814  | -2901 | 11099 | 78 |
| H(1SE) | 1228  | -2885 | 10797 | 78 |
| H(3SA) | 1428  | -4707 | 12552 | 98 |
| H(3SB) | 1468  | -3352 | 12605 | 98 |
| H(3SC) | 2915  | -4405 | 12845 | 98 |

---

Table 6. Hydrogen bonds for SHELLMYCINA [ $\text{\AA}$  and  $^\circ$ ].

| D-H...A               | d(D-H) | d(H...A) | d(D...A) | $\angle$ (DHA) |
|-----------------------|--------|----------|----------|----------------|
| O(1)-H(1)...O(2S)#1   | 0.84   | 2.35     | 3.040(4) | 139.4          |
| O(2)-H(2)...O(2S)#1   | 0.84   | 1.97     | 2.802(4) | 172.4          |
| O(5)-H(5)...O(6)      | 0.84   | 1.74     | 2.492(4) | 148.4          |
| O(7)-H(7)...O(1S)     | 0.84   | 1.86     | 2.687(5) | 168.2          |
| O(9)-H(9)...O(4')     | 0.84   | 1.83     | 2.659(4) | 167.6          |
| O(1')-H(1')...O(7)#2  | 0.84   | 1.90     | 2.729(4) | 167.8          |
| O(2')-H(2')...O(2S)#3 | 0.84   | 2.28     | 3.084(5) | 160.2          |
| O(5')-H(5')...O(6')   | 0.84   | 1.74     | 2.497(4) | 148.8          |
| O(7')-H(7')...O(1')#4 | 0.84   | 2.07     | 2.809(4) | 146.4          |
| O(9')-H(9')...O(4)    | 0.84   | 1.87     | 2.687(4) | 164.2          |
| O(2S)-H(2S)...O(7')   | 0.84   | 1.91     | 2.747(5) | 172.1          |
| O(1S)-H(1S)...O(2')#1 | 0.84   | 2.13     | 2.952(4) | 164.8          |

Symmetry transformations used to generate equivalent atoms:

#1  $x, y-1, z$  #2  $x+1, y+1, z$  #3  $x, y-1, z+1$  #4  $x, y+1, z-1$
